1 Loss of coiled-coil protein Cep55 impairs abscission processes and results in p53-dependent apoptosis in  
2 developing cortex

3

4 Jessica N. Little<sup>1,3\*</sup>, Katrina C. McNeely<sup>1\*</sup>, Nadine Michel<sup>2,3</sup>, Christopher J. Bott<sup>1</sup>, Kaela S. Lettieri<sup>1</sup>,  
5 Madison R. Hecht<sup>1</sup>, Sara A. Martin<sup>1</sup> and Noelle D. Dwyer<sup>1#</sup>

6

7 \*co-first author

8 <sup>1</sup>Department of Cell Biology, and <sup>2</sup>Department of Biochemistry and Molecular Genetics, and <sup>3</sup>Medical  
9 Scientist Training Program, University of Virginia School of Medicine, Charlottesville, VA, USA

10 #author for correspondence: [ndwyer@virginia.edu](mailto:ndwyer@virginia.edu)

11

## 12 **Abstract**

13

14 To produce a brain of normal size and structure, embryonic neural stem cell (NSCs) must tightly regulate  
15 their cell divisions. Cerebral cortex NSCs undergo a polarized form of cytokinesis whose regulation is  
16 poorly understood. Cytokinetic abscission severs the daughter cells and is mediated by the midbody at the  
17 apical membrane. Here we elucidate the role of the coiled-coil midbody protein Cep55 in NSC abscission  
18 and brain development. A knockout of Cep55 in mice causes microcephaly with reduced NSCs and  
19 neurons, but relatively normal body size. Fixed and live analyses show NSCs lacking Cep55 have  
20 decreased but not eliminated ESCRT recruitment, and have abnormal abscission and higher rates of  
21 failure. P53-mediated apoptosis is greatly increased in the brain, but not other tissues, and p53 knockout  
22 partly rescues brain size. Thus, loss of Cep55 causes abscission defects and failures in multiple cell types,  
23 but the secondary p53 response and apoptosis is brain-specific.

24

## 25 **Introduction**

26

27 Embryonic neural stem cells (NSCs) must undergo rapid divisions within strict developmental  
28 time windows to produce numerous daughter cells of various fates, to build a brain of correct size and  
29 structure. They do so within a polarized epithelium, with their apical membranes forming the ventricle  
30 wall, and their basal processes contacting the pia. Their nuclei move to the apical membrane for mitosis  
31 and cytokinesis. We previously showed cytokinesis in NSCs is polarized and developmentally regulated  
32 (McNeely & Dwyer, 2020). The cleavage furrow ingresses asymmetrically, forming the midbody within  
33 the apical membrane. The midbody then mediates severing of the intercellular bridge, in a process called  
34 abscission. Errors in cytokinesis are one etiology of microcephaly, in which the brain is  
35 disproportionately small relative to body size (Bondeson et al., 2017; Di Cunto et al., 2000; Frosk et al.,  
36 2017; Li et al., 2016; Makrythanasis et al., 2018; Moawia et al., 2017). We previously showed mutation

37 of the Kinesin-6 family member Kif20b disrupts normal cytokinetic abscission to cause microcephaly in  
38 mice (Dwyer et al., 2011; Janisch et al., 2013; Little & Dwyer, 2019). The unique constraints of NSCs  
39 during cell division have been hypothesized to make brain growth more vulnerable to defects in mitosis or  
40 cytokinesis than other tissues. However, the cellular and developmental mechanisms that drive these  
41 tissue-specific requirements are just beginning to be identified.

42 Cytokinesis has long been studied in cell lines and invertebrate organisms; this work has  
43 identified many required proteins, and generated a model for the mechanism of abscission (Green et al.,  
44 2012; Mierzwa & Gerlich, 2014). Beginning in anaphase following chromosome segregation, the  
45 ingressing furrow compacts the central spindle microtubules and associated proteins into a structure  
46 called the midbody, within the intercellular bridge. The midbody has a thick central bulge flanked on  
47 either side by dense microtubule bundles. This complex structure consists of over 450 proteins that  
48 mediate midbody formation, maturation, and the final scission event, in which the midbody flanks are  
49 severed to separate the two daughter cells (Addi et al., 2020; Hu et al., 2012; Skop et al., 2004). The  
50 abscission process involves both microtubule disassembly and membrane severing, thought to be  
51 mediated by the endosomal sorting complexes required for transport (ESCRT) filaments (Connell et al.,  
52 2009; Guizetti et al., 2011). The duration of abscission can be regulated, and slower abscission has been  
53 linked to stemness (Chaigne et al., 2019; Lenhart & DiNardo, 2015; McNeely & Dwyer, 2020). After  
54 abscission, the central bulge domain remains intact as the midbody remnant (MBR). Studies in  
55 mammalian cell lines suggest that the MBR may mediate cell signaling and fate, either by binding cell  
56 surface receptors or through uptake into daughter or neighbor cells (Crowell et al., 2014; Peterman et al.,  
57 2019). We previously showed that in embryonic brains, MBRs can be visualized on the apical membranes  
58 of cortical NSCs. Interestingly, MBRs are more persistent at early proliferative stages, and downregulated  
59 later (McNeely & Dwyer, 2020).

60 The coiled-coil scaffolding protein Cep55 is thought to be essential for abscission in cell lines  
61 (Fabbro et al., 2005; Zhao et al., 2006), with the key role of initiating the cascade of ESCRT recruitment  
62 in midbodies (Stoten & Carlton, 2018). However, invertebrates lack a *Cep55* orthologue in their genomes,  
63 yet complete abscission. Human mutations of *Cep55* cause a variety of brain malformations (Barrie et al.,  
64 2020; Bondeson et al., 2017; Frosk et al., 2017; Rawlins et al., 2019). That human embryos with *Cep55*  
65 mutation are able to develop at all is surprising, given that knockdown of *Cep55* in human cell lines  
66 caused almost universal failure of cell division (Fabbro et al., 2005; Zhao et al., 2006).

67 Here, we use a mouse knockout to elucidate the roles and requirements of *Cep55* in abscission of  
68 neural stem cells during brain development. We find *Cep55* is not absolutely required for abscission in  
69 NSCs or other embryonic cells, but its loss causes abnormalities and increases failures. NSCs are  
70 especially vulnerable to loss of *Cep55* compared to other tissues, and brain size is disproportionately

71 reduced. Surprisingly, we find ESCRT recruitment is not eliminated in *Cep55* *-/-* cell midbodies, though  
72 it is impaired. We use fixed and live imaging of intact cortical epithelium to probe Cep55's role in  
73 abscission. Additionally, we find the severe effect on the nervous system compared to other tissues  
74 appears to be due to a specific p53 response triggering apoptosis, and test this using double knockout of  
75 Cep55 and p53. This work underlines that studying cytokinetic proteins and processes in the context of  
76 developing tissues is necessary to complement single cell models, in order to understand both the cellular  
77 roles of specific proteins, and how their loss can cause various phenotypes at the tissue and organism  
78 level.

79

## 80 **Results**

81

### 82 ***Cep55* knockout results in microcephaly with thin neuronal and axonal layers**

83

84 The mutation of *Cep55* used in this analysis is a 600 base-pair deletion encompassing all of exon  
85 6 and flanking intronic sequence, generated by the CMMR (see Methods). The total murine *Cep55* gene  
86 consists of 9 exons encoding a protein of 462 amino acids (AA) (**Figure 1A**). Cep55 protein domains  
87 include two coiled-coil regions (CC1 and CC2) surrounding the ESCRT- and Alix- binding region  
88 (EABR), and two ubiquitin binding domains (UBD) in the C-terminus (Lee et al., 2008; Morita et al.,  
89 2007; Said Halidi et al., 2019). This deletion is predicted to result in a frameshift starting at AA 227,  
90 resulting in multiple premature stop codons starting after AA 237. The Cep55 protein is undetectable by  
91 immunoblot of homozygous mutant tissue lysates (**Figure 1B**).

92 Given that Cep55 was reported to be essential for mammalian cell division (Fabbro et al. 2005;  
93 Zhao et al. 2006), we were surprised to discover that *Cep55* *-/-* mice are born alive at expected Mendelian  
94 ratios, and appear grossly normal with a slightly small body (**Figure 1C**). However, while the pups  
95 survive postnatally, they fail to thrive and die before or around weaning (**Figure 1 – figure supplement**  
96 **1A-C**). Upon inspection, *Cep55* *-/-* pups have slightly flattened heads (**Figure 1C, arrow; Figure 1 –**  
97 **figure supplement 1D**), and a 10% reduction in body length (**Figure 1D**). Removing the brains from the  
98 heads revealed that *Cep55* *-/-* mice have severe microcephaly, with a 50% reduction in cortical area and  
99 30% reduction in cortical length on postnatal day 0 (P0) (**Figure 1 E, G, H**). Dissection of prenatal brains  
100 showed a similar reduction in brain size compared to controls at embryonic day (E)14.5 and a smaller  
101 (8%) reduction at age E12.5 (**Figure 1F-H**). Cortical size is disproportionately reduced compared to body  
102 size (**Figure 1I**). However, eye size is normal in *Cep55* *-/-* pups (**Figure 1 – figure supplement 1D-F**). In  
103 addition to reduced brain size, *Cep55* *-/-* mice have reduced cortical thickness at P0 (**Figure 1J, K**). Thus,

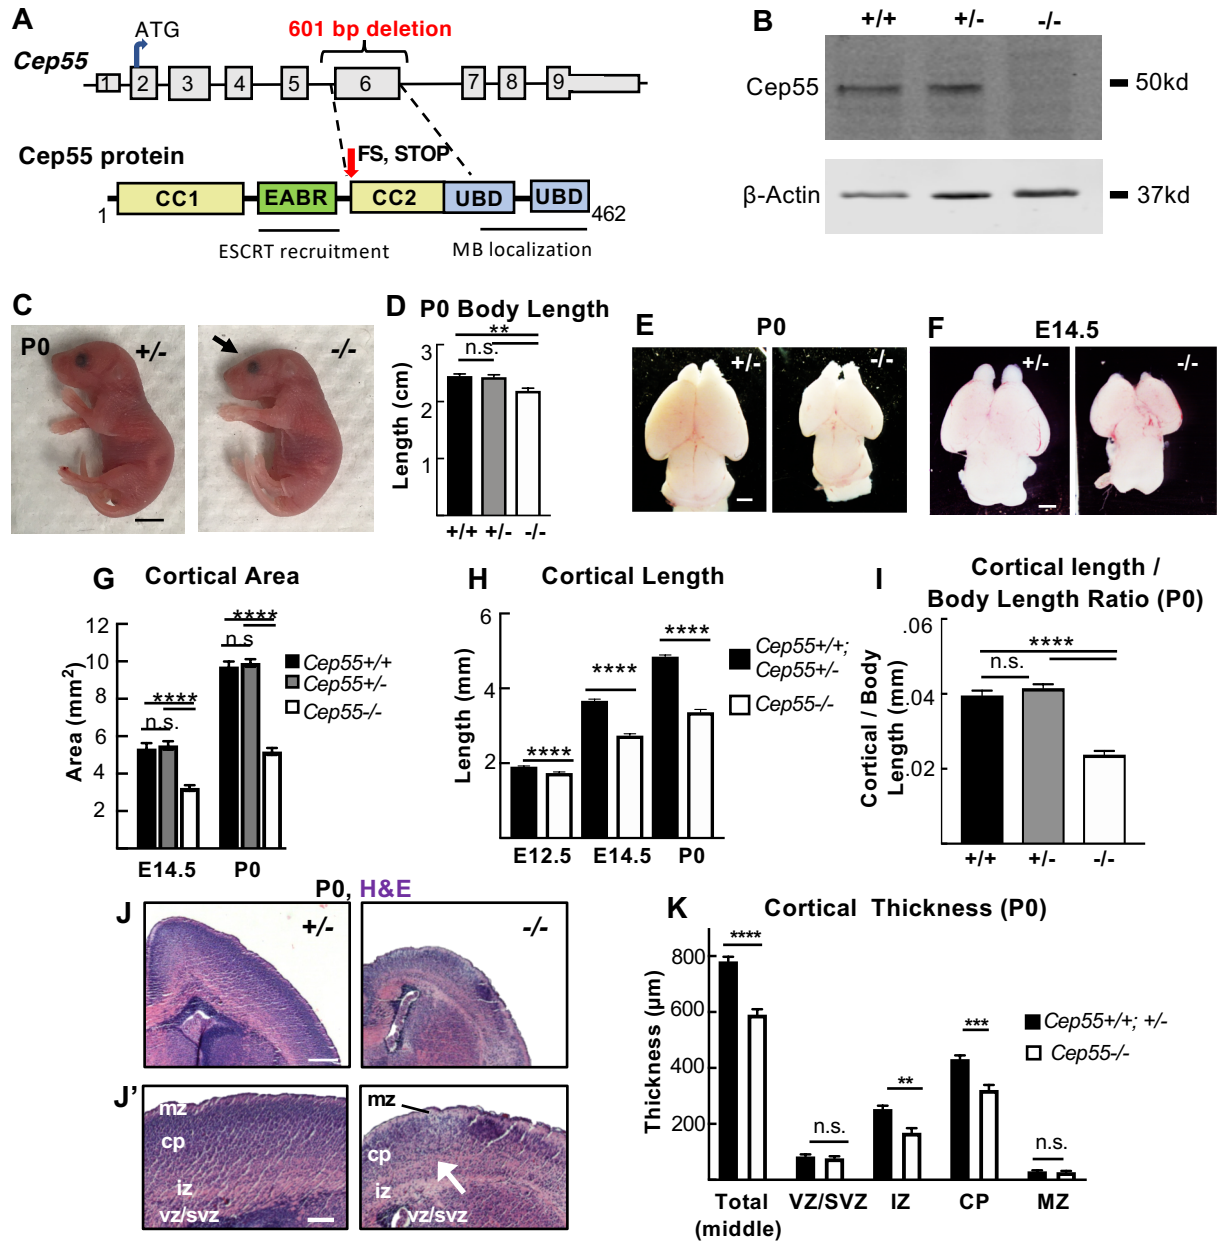

**Figure 1: *Cep55* knockout causes microcephaly with severe thinning of neuronal and axon layers.**

**(A)** Schematics of *Cep55* mouse gene and protein (not to scale). The 601 base-pair deletion includes all of exon 6 (311 bp) and portions of flanking introns. *Cep55* protein domains include two coiled-coil regions (CC1 and CC2) surrounding the ESCRT- and Alix- binding region (EABR), and two ubiquitin binding domains (UBD). The deletion of exon 6 is predicted to result in a frameshift (FS) at amino acid 226 which causes multiple premature stop codons starting 12 residues later. **(B)** Immunoblots of E14.5 mouse embryonic fibroblast (MEF) lysates show the expected *Cep55* protein product at approximately 55 kDa in wild-type and heterozygote samples, but not in ko samples. **(C,D)** Newborn *Cep55*<sup>-/-</sup> pups have 10% shorter body length and a flatter head (arrow) but otherwise appear morphologically similar to controls. **(E-G)** Representative images and measurements show mean cortical area is reduced in *Cep55*<sup>-/-</sup> brains at P0 and E14.5 compared to +/+ and +/- controls. **(H)** Mean cortical length is significantly reduced in *Cep55*<sup>-/-</sup> at E12.5, E14.5, and P0. **(I)** The cortical length in *Cep55*<sup>-/-</sup> P0 pups is disproportionately small relative to body size. **(J)** Representative images of P0 *Cep55*<sup>+/-</sup> and *-/-* coronal sections at level of corpus callosum, stained with H&E. mz, marginal zone; cp, cortical plate; iz, intermediate zone; vz/svz, ventricular/subventricular zone. *Cep55*<sup>-/-</sup> have reduced cell density in neuronal layers (J', arrow). **(K)** Mean total cortical thickness is significantly reduced in *Cep55*<sup>-/-</sup> brains at P0. The VZ/SVZ and MZ thickness are unaltered, but the intermediate zone (IZ) and cortical plate (CP) are significantly thinner. For P0, n = 7 *Cep55*<sup>+/+</sup>, 14 +/- and 8 *-/-* mice. For E14.5, n = 5 *Cep55*<sup>+/+</sup>, 13 +/- and 10 *-/-* mice; for E12.5, n = 17 *Cep55*<sup>+/+</sup>, +/- and 9 *-/-* mice. For (L), n = 3 *Cep55*<sup>+/+</sup>, 5 +/-, and 5 *-/-* mice. Scale bars: C: 5 mm; E and F: 1 mm; J, 250  $\mu$ m, J' 100  $\mu$ m. n.s., not significant. \*\* p < 0.01; \*\*\* p < 0.001, \*\*\*\* p < 0.0001. D, G, and I: One-way ANOVA; H, K: Student's t-test.

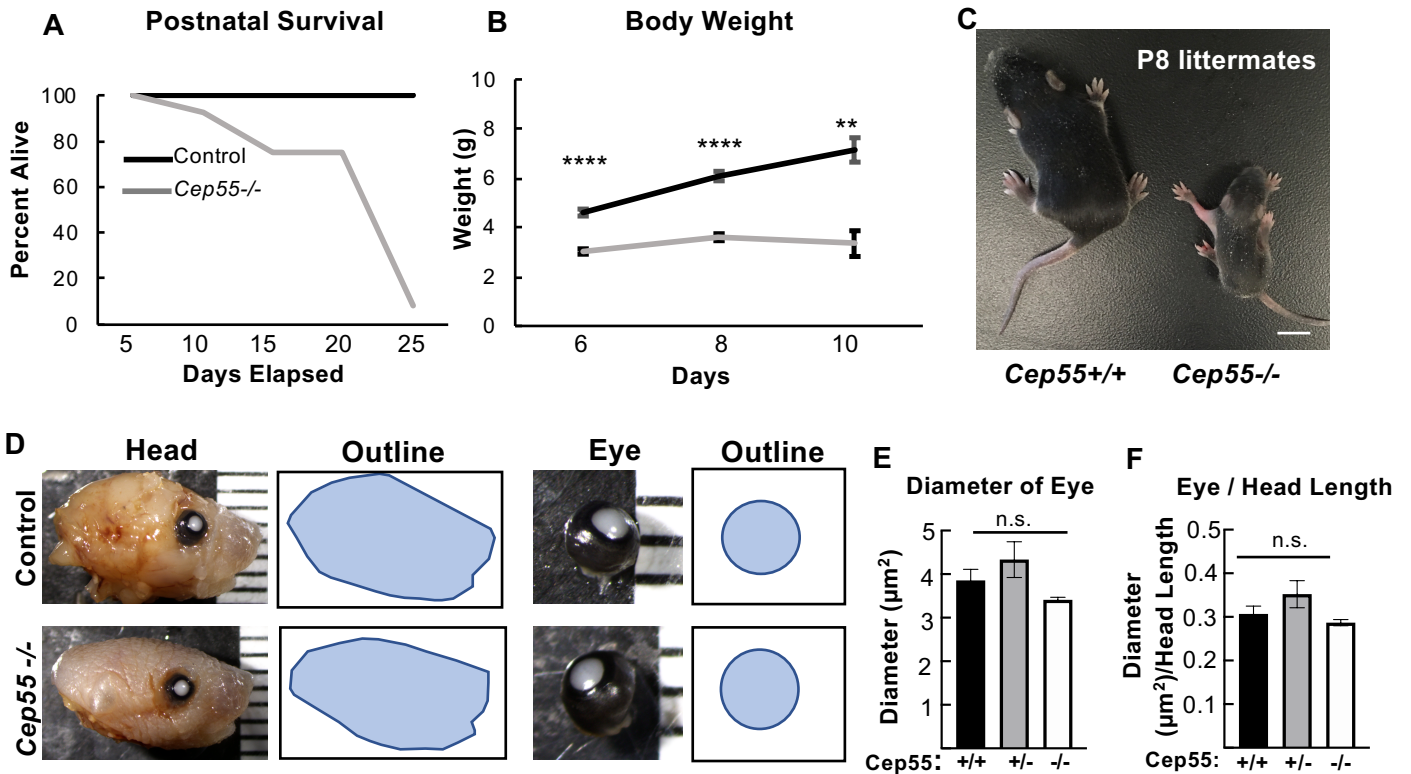

**Figure 1 – figure supplement 1: *Cep55* knockout mice exhibit normal eye size and can survive postnatally, but exhibit failure to thrive and peri-weaning lethality.**

(A-C) *Cep55*<sup>-/-</sup> mice exhibit failure to thrive and pre-weaning lethality. (A) Most <sup>-/-</sup> pups die in the second or third week of life, and none survived past 25 days. n = 46 controls, 12 *Cep55*<sup>-/-</sup>. (B-C) *Cep55*<sup>-/-</sup> mice fail to gain weight between 6 and 10 days postnatally and are significantly smaller than controls. n, days: 6 = 13 controls and 6 <sup>-/-</sup>; 8 = 26 controls and 13 <sup>-/-</sup>, 10 = 11 controls and 4 <sup>-/-</sup>. (D) Examples of postnatal day 1 control and *Cep55*<sup>-/-</sup> heads and dissected eyes. Note flatter head shape of *Cep55*<sup>-/-</sup> apparent in the outline. (E) Average eye diameter is not significantly changed in *Cep55*<sup>-/-</sup> pups. (F) Normalizing eye diameter to length of head showed no change between control and *Cep55*<sup>-/-</sup>. n = 6 +/+, 9 +/-, 5 -/- pups. Scale bar: C, 5 mm. n.s., not significant, \*\* p < 0.01, \*\*\*\* p < 0.0001. B: Student's t-test, E, F: One-way ANOVA.

104 *Cep55* loss in mice appears to more drastically disrupt brain development than body development, and the  
105 reduction in cortical growth correlates with the onset of neurogenesis around E12.5.

106 To determine if *Cep55* *-/-* mice have normal brain structure, we analyzed P0 cross sections  
107 stained with hematoxylin and eosin (H&E) to label nuclei and axons, respectively. We noted a reduction  
108 in size of all brain regions, including the forebrain, midbrain, and hindbrain (**Figure 1 – figure  
109 supplement 2A**). However, the forebrain appeared to be most severely affected. Interestingly, while  
110 cortical thickness is reduced globally, the caudal cortex is the most severely affected (**Figure 1 – figure  
111 supplement 2B, C**).

112 To begin to determine the cellular cause of the thinner cortex in *Cep55* knockouts, we compared  
113 the thicknesses of individual cortical layers in P0 control and mutant brains. Cortical stem (NSC) and  
114 progenitor cells reside in the ventricular zone (vz) and subventricular zone (svz), while post-mitotic  
115 neurons reside in the cortical plate (cp), and project their axons in the intermediate zone (iz). The cp and  
116 iz of *Cep55* *-/-* cortices are significantly reduced in thickness, while the vz and svz are not (**Figure 1J, K**),  
117 suggesting a deficit of neurons. To examine the neuronal layers within the cortical plate, we labeled  
118 control and *Cep55* *-/-* cortical sections with *Ctip2*, for layers 5 and 6, and *Satb2*, for layers 2-4 (**Figure 1  
119 – figure supplement 2D**). *Cep55* *-/-* cortical layers are ordered similarly to controls, but all are reduced in  
120 thickness (**Figure 1 – figure supplement 2E**). As a proportion of the total cp, the deep layers 5-6 of  
121 *Cep55* *-/-* brains occupy more space, while the upper layers 2-4 occupy less (**Figure 1 – figure  
122 supplement 2F**). Interestingly, both the absolute number and the density of nuclei in layer 6 are  
123 significantly reduced (**Figure 1 – figure supplement 2G, H**). Together these data show the reduced  
124 thickness of *Cep55* *-/-* cortices at birth is attributable to reduced thickness of all neuronal layers and  
125 reduced number of neurons.

126

### 127 **NSCs are reduced and cortical layers are disorganized in *Cep55* knockout brains**

128

129 To begin to address the developmental defects leading to smaller brain size at birth, we examined  
130 earlier stages of cortical development. Because *Cep55* *-/-* brains are already dramatically reduced in size  
131 at E14.5, and this is an age when the cortical plate is forming, we analyzed numbers and positions of  
132 NSCs, basal progenitors (BPs), and neurons at this age. By labeling E14.5 sections with neuronal tubulin  
133 (*Tubb3*), we noted the cp was already thinner in *Cep55* *-/-* cortices, and the iz layer of axons was not  
134 distinct (**Figure 2A**). *Cep55* *-/-* cortical thickness is reduced by 12% at E14.5 (compared to 25% at P0,  
135 **Figure 1K**), and similar to newborn brains, this reduction is due to thinner neuronal (cp and iz) rather  
136 than proliferative layers (vz and svz) (**Figure 2B**). As a proportion of total thickness, the proliferative

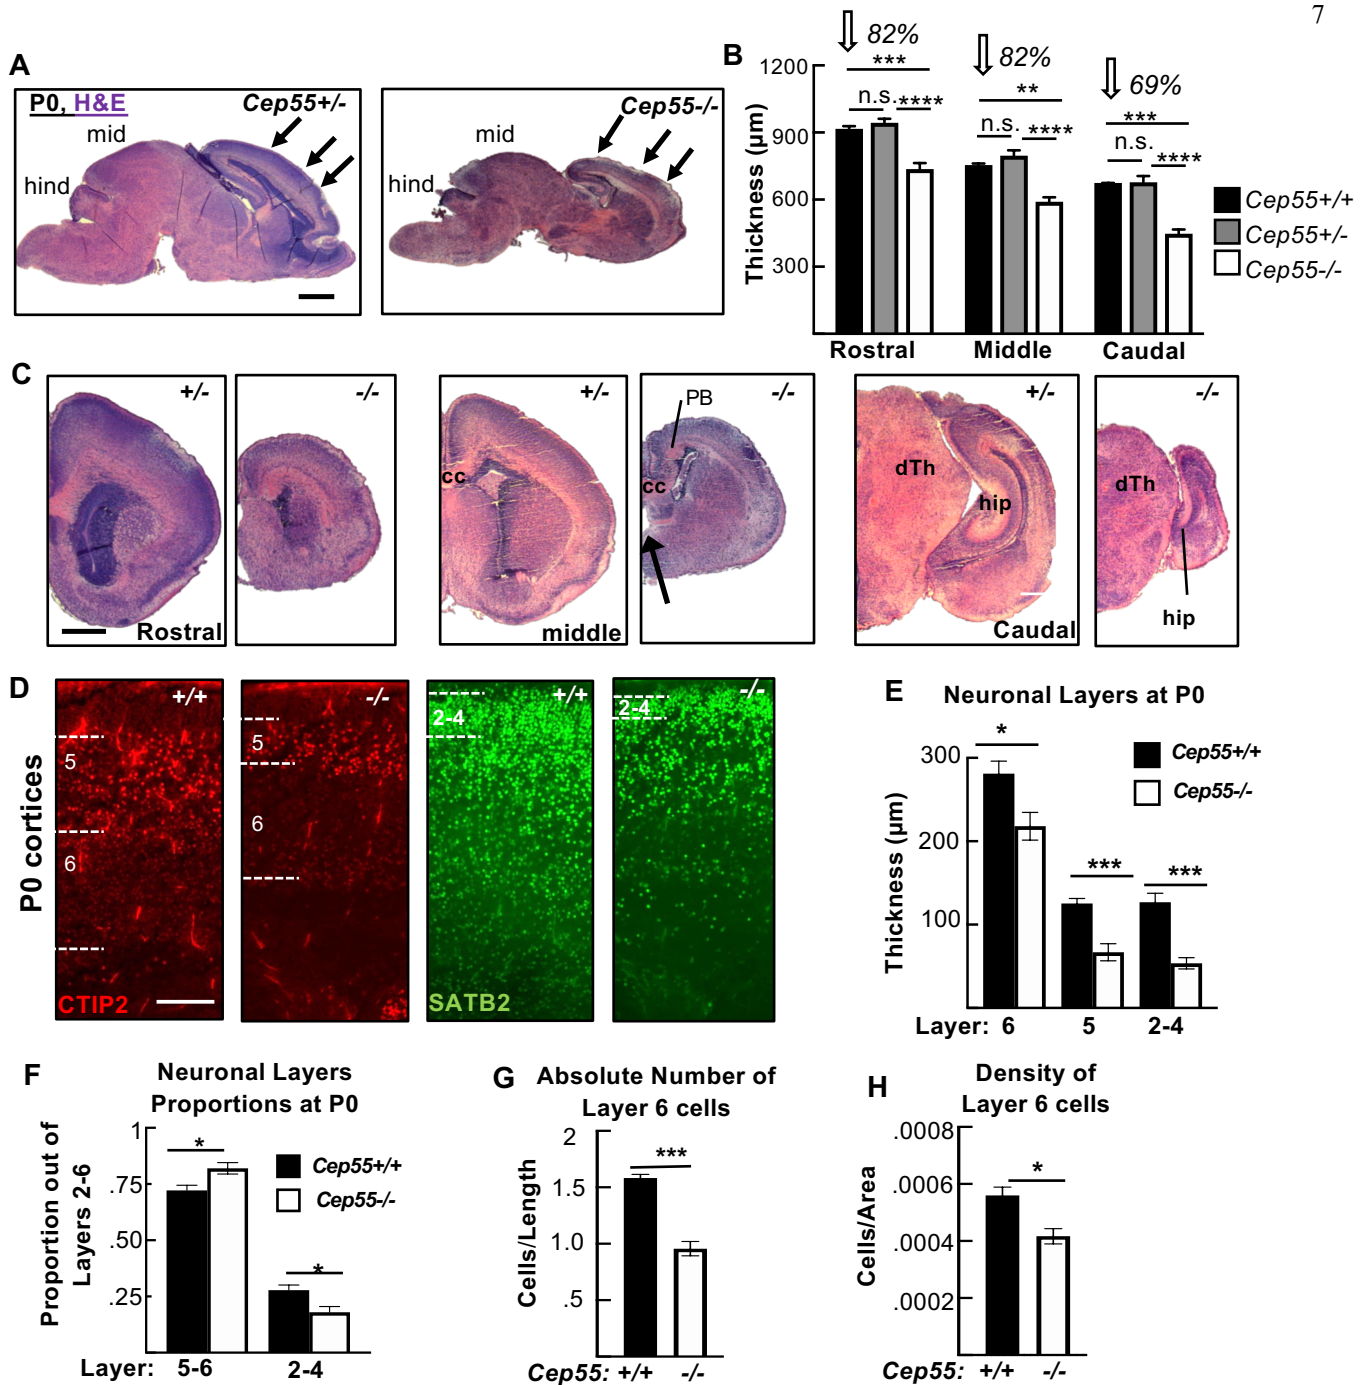

**Figure 1 – figure supplement 2: *Cep55* knockout cortices are thinner, especially in caudal cortex, with reduced thickness but preserved order of neuronal layers and reduced neuron density.**

(A, C) Representative *Cep55*<sup>+/-</sup> and *-/-* sagittal (A) and coronal (C) sections of P0 brains stained with hematoxylin and eosin (H&E). Arrows in A mark approximate locations of rostral, middle, and caudal, coronal sections in C. mid and hind signify midbrain and hindbrain; PB, Probst bundles of axons; hip, hippocampus; cc, corpus callosum; dTh, dorsal Thalamus. (B) The mean cortical thickness in *Cep55*<sup>-/-</sup> brains is 82% of normal in rostral and middle sections, and only 69% of normal in caudal sections. For B, n = 3 *Cep55*<sup>+/+</sup>, 5 *Cep55*<sup>+/-</sup>, and 5 *Cep55*<sup>-/-</sup> mice. (D) Representative images of P0 *Cep55*<sup>+/+</sup> and *-/-* cortical sections labeled with antibodies to CtIP2, marking layers 6 (faint staining) and 5 (bright staining) and Satb2, marking layers 2-4. (E) All neuronal layers are significantly thinner in *Cep55*<sup>-/-</sup> cortices at P0. (F) Layers 5-6 occupy a larger proportion of cp while layers 2-4 occupy a decreased proportion of the cp in *Cep55*<sup>-/-</sup> cortices compared to *+/+* controls. (G) The absolute number of layer 6 cells (# nuclei/length of cortex) is reduced by 40% in *Cep55*<sup>-/-</sup> cortices. (H) *Cep55*<sup>-/-</sup> layer 6 neurons are 25% less dense than wild-type cells (# nuclei/area). For G,H: n = 5 *Cep55*<sup>+/+</sup> and 4 *Cep55*<sup>-/-</sup> mice; for I,K,J, n = 3 *Cep55*<sup>+/+</sup> and 3 *Cep55*<sup>-/-</sup> mice. Scale bar: A, C: 500µm, D: 100 µm. \* p < 0.05; \*\* p < 0.01, \*\*\* p < 0.001, \*\*\*\* p < 0.0001. B: one-way ANOVA. G-J: t-test.

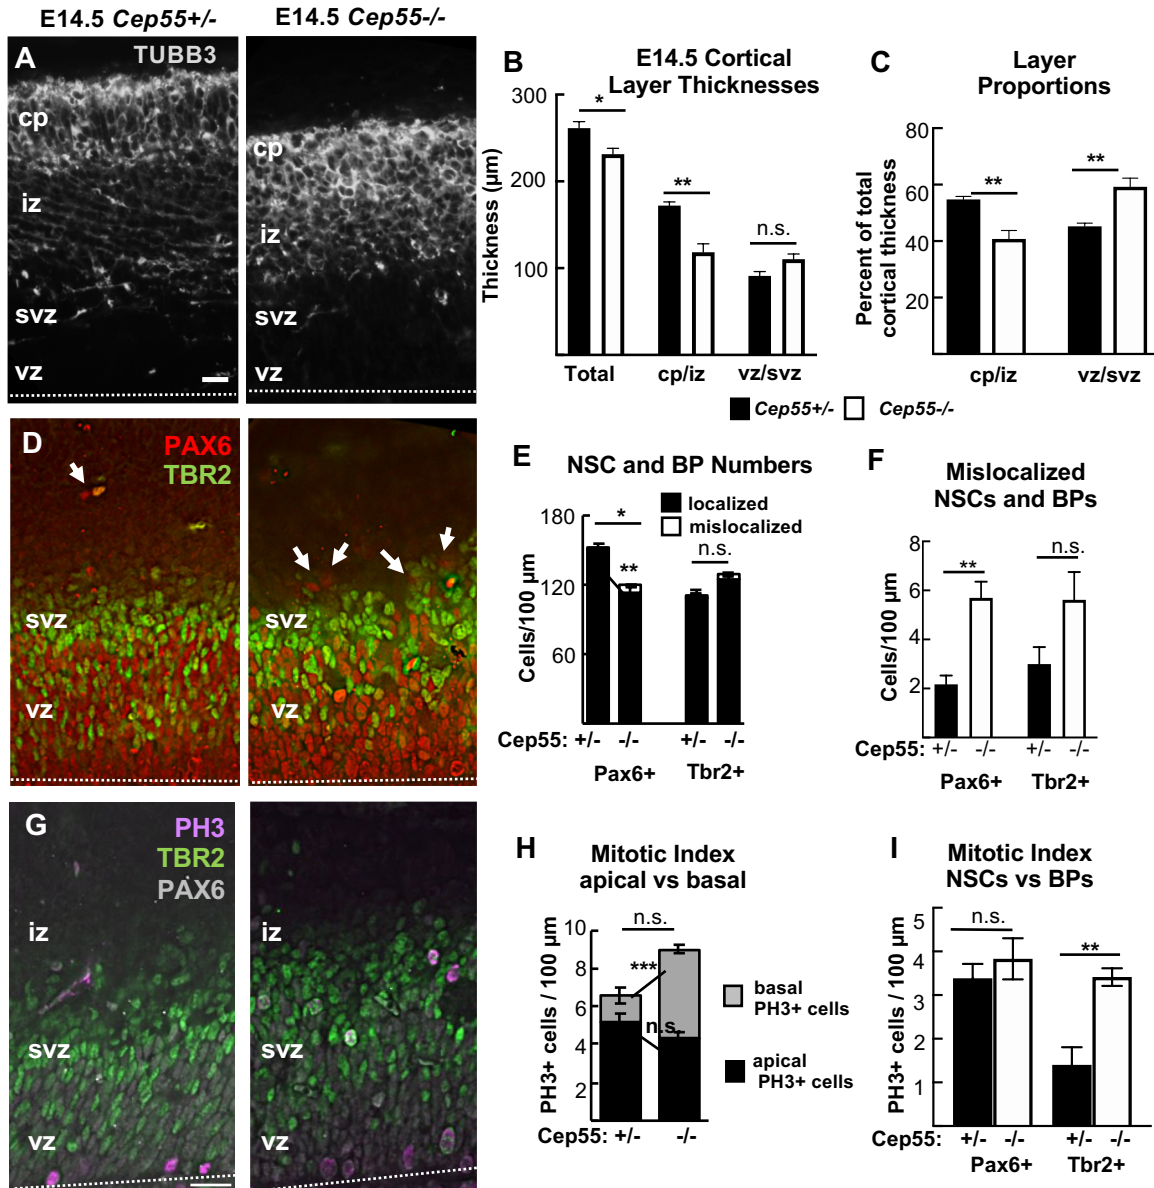



137 layer is increased (**Figure 2C**). These data show that neuron production is already compromised before  
138 E14.5.

139         The neurons of the cp are daughters of cell divisions of NSCs and basal progenitors. NSCs divide  
140 many times, first symmetrically to multiply the NSCs, and then asymmetrically to produce BPs and  
141 neurons. BPs divide symmetrically to produce two neurons. Neuron daughters exit the cell cycle and  
142 differentiate. To determine whether the organization and numbers of NSCs and BPs in *Cep55*<sup>-/-</sup> cortices  
143 are altered, we used Pax6 and Tbr2 antibodies to mark them respectively (**Figure 2D**). We observe a  
144 decrease in the number of NSCs in *Cep55*<sup>-/-</sup> cortices, while the number of basal progenitors is normal  
145 (**Figure 2E**). Notably, NSC and BP positioning appears disorganized, with a small but significant number  
146 of NSC nuclei mislocalized at positions basal to the svz (**Figure 2D – arrows; Figure 2E, F**).

147         Cep55 is not thought to have a primary role in mitosis (Fabbro et al., 2005). To check this, we  
148 measured mitotic index in knockout brains, using phospho-histone3 (PH3) (**Figure 2G**). There appears to  
149 be a trend for increased numbers of mitotic cells in *Cep55*<sup>-/-</sup> cortical sections (6.69 versus 9 cells per 100  
150  $\mu\text{m}$ ;  $p = 0.11$ ) (**Figure 2H**); however, the increase is in basally rather than apically positioned mitotic  
151 nuclei, and is due to an increase in the mitotic index of BPs, not NSCs (**Figure 2I**). This suggests there is  
152 not a primary defect in mitosis duration in *Cep55*<sup>-/-</sup> NSCs. Overall, these data demonstrate there are  
153 reduced numbers of both NSCs and neurons in the *Cep55*<sup>-/-</sup> cortex, with slight disorganization of  
154 layering, but not a significant increase in mitotic NSCs.

155

### 156 **Cep55 is expressed in proliferative cells in the brain and body, and is specifically detected in** 157 **midbodies during late abscission**

158

159         Having found defects in *Cep55*<sup>-/-</sup> neurons, NSCs and BPs, we needed to ascertain in which of  
160 these cell types Cep55 is expressed. Previous RNA sequencing experiments found *Cep55* mRNA  
161 expressed in proliferating cell types in early mouse embryos (Gao et al., 2017); and in the murine cerebral  
162 cortex at E14.5 and P0 (Loo et al., 2019). RNA *in situ* hybridization shows *Cep55* is expressed in  
163 proliferative zones of the cortex and eye at E14.5, but is not detectable in neuronal layers. Lower  
164 expression in other proliferating tissues is observed (**Figure 3 – figure supplement 1A-C**). We tested for  
165 endogenous Cep55 protein expression and subcellular localization by immunohistochemistry on control  
166 and knockout cells, and detected Cep55 protein in dividing NSCs of control embryos, but not knockouts  
167 (**Figure 3A-C**). Interestingly, Cep55 is specifically detected only at late stages of abscission: in late  
168 midbodies as a disk at the center of the midbody, and in the post-abscission midbody remnants (MBRs).  
169 No specific Cep55 signal was detected in metaphase, anaphase, or early midbodies. In basal progenitors

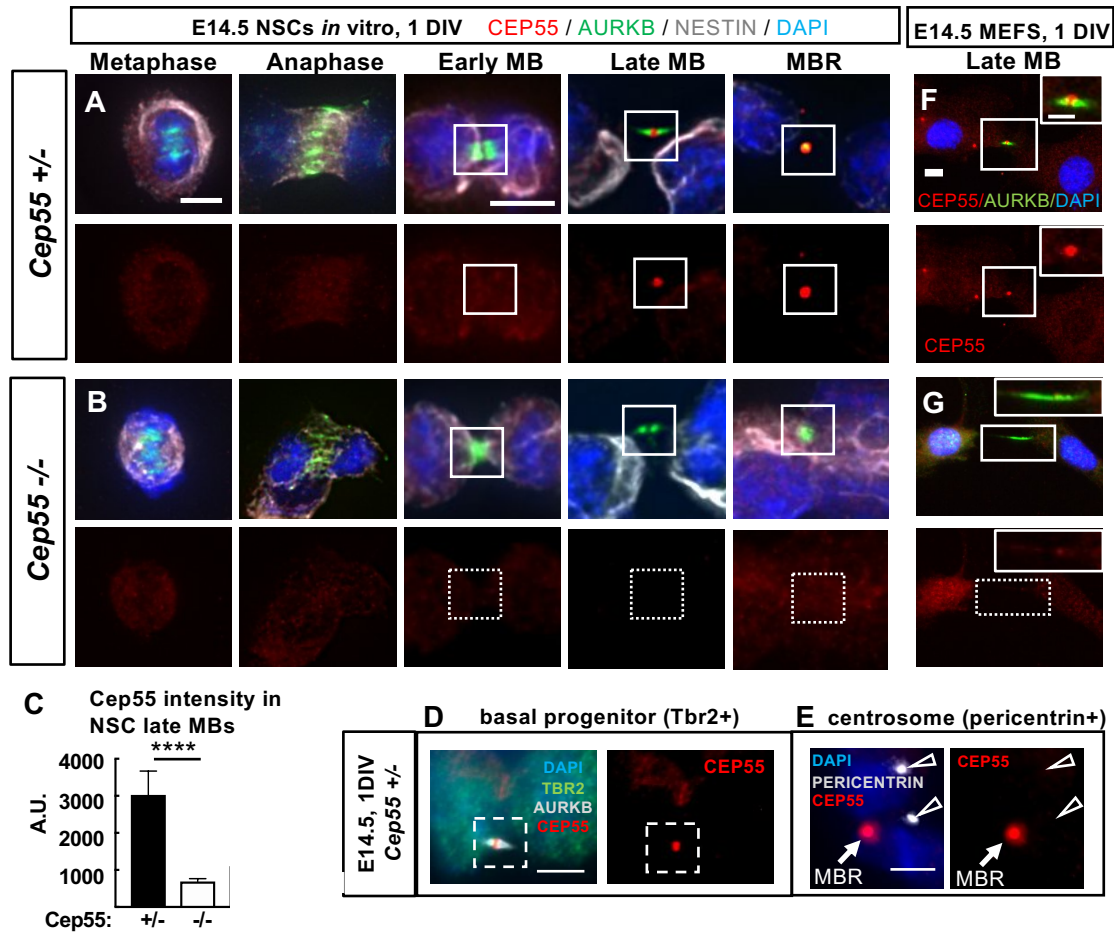

**Figure 3: Cep55 protein localizes in late-stage midbodies of NSCs, basal progenitors and MEFs.** (A, B) Representative images of control (+/-) and *Cep55* knockout (-/-) E14.5 neural stem cells (NSCs) undergoing cytokinesis that were cultured for 1 day *in vitro* (DIV) fixed and immunostained for endogenous Cep55 (red), Aurora kinase B (green), Nestin for NSCs (grey) and DAPI. Cep55 is not detectable in mitotic spindles or centrosomes in metaphase, anaphase, or early midbody stage NSCs, but does accumulate in a disk in the center of late midbodies and in midbody remnants in control (A) but is undetectable in knockout (B) NSCs. (C) Quantification of endogenous Cep55 IF signal intensity in control and -/- NSCs midbodies. (D) Cep55 in a late-stage midbody of a basal progenitor from control brain. (E) Cep55 signal was not detected at centrosomes, marked by pericentrin, in NSCs (open arrows), but is detected in a nearby midbody remnant (closed arrow). (F, G) *Cep55*<sup>+/+</sup> MEFs show a similar pattern of Cep55 localization as NSCs, with accumulation only in late-stage midbodies (F), but is undetectable in *Cep55*<sup>-/-</sup> MEF midbodies (G). Scale bars: A, metaphase and early midbody: 5  $\mu$ m; D: 4  $\mu$ m; E: 5  $\mu$ m; F: 10  $\mu$ m, inset 5  $\mu$ m. \*\*\*\*, p < 0.0001, Student's t-test.

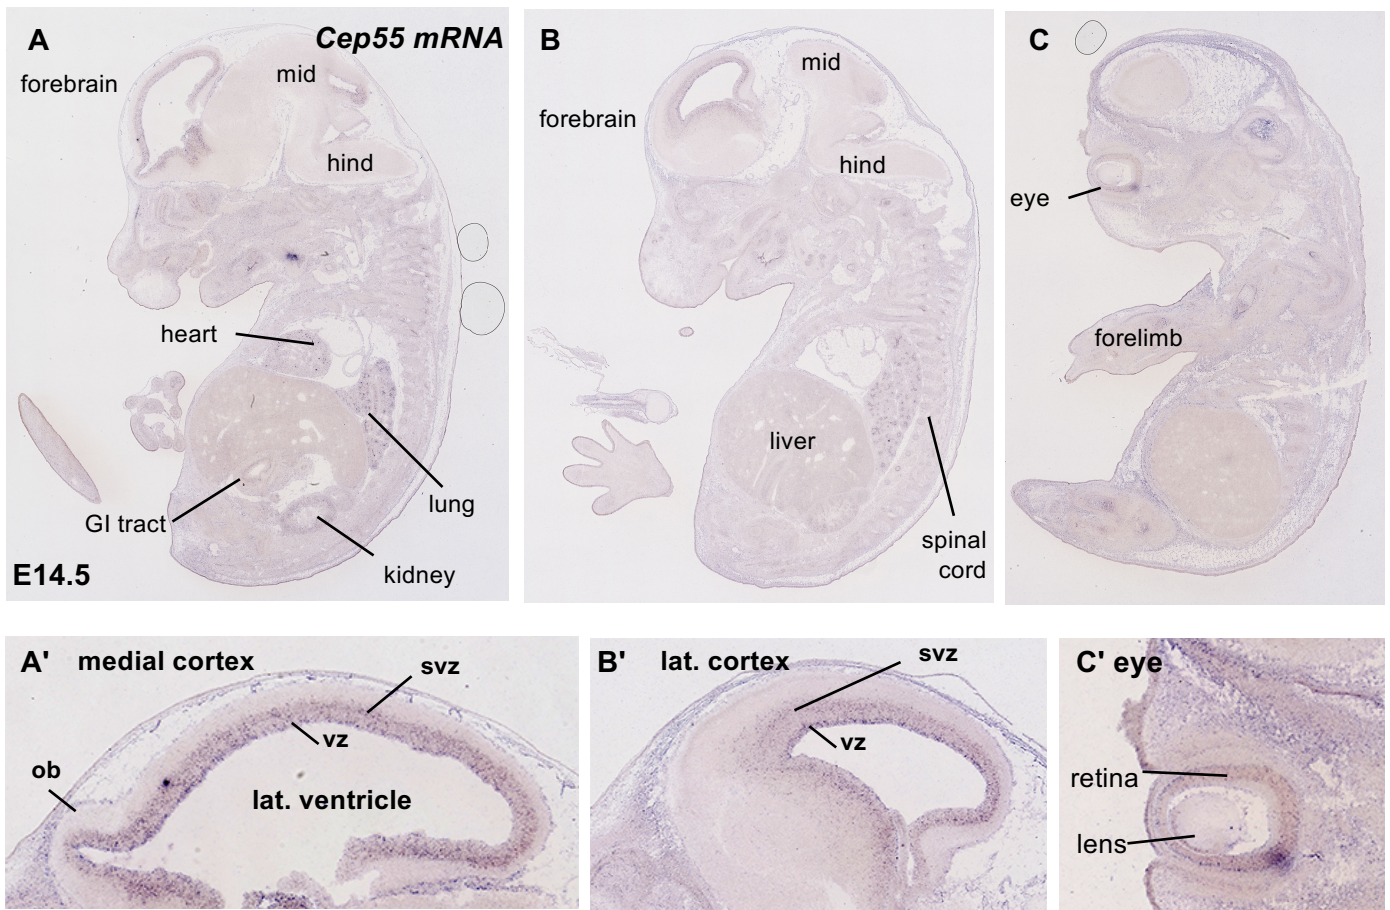

**Figure 3 – figure supplement 1: *Cep55* mRNA is expressed in proliferating embryonic tissues, including germinal zones of the nervous system.**

(A-C) Images of RNA in situ hybridization for *Cep55* mRNA on sagittal sections of E14.5 mouse embryos. *Cep55* is expressed in germinal zones of the nervous system including brain and eye, as well as widespread in proliferating embryonic tissues. Structures of interest in sagittal sections are labeled in whole embryo (A-C) and in zoomed forebrain (A'-B') and eye (C') images. mid: midbrain; hind: hindbrain; ob: olfactory bulb; vz: ventricular zone; svz: subventricular zone; lat vent: lateral ventricle. (Images from GenePaint, <https://gp3.mpg.de>, Visel et al. 2004).

170 from control brains, Cep55 has the same localization pattern (**Figure 3D**). We do not detect Cep55  
171 protein at centrosomes (**Figure 3E**), concurring with others (Bastos & Barr, 2010; Zhao et al., 2006).

172 To investigate whether Cep55 is expressed in cells of non-neural tissues, we dissociated mouse  
173 embryonic fibroblasts (MEFs) from E14.5 control and *Cep55*<sup>-/-</sup> embryo bodies. We noted the same  
174 expression pattern in MEFs as in NSCs, with detectable signal above background only in late-stage  
175 midbodies of control MEFs (**Figure 3F, G**). Thus, we find Cep55 is expressed in multiple proliferating  
176 embryonic cell types – NSCs, BPs and MEFs – and that it accumulates specifically at the late stage of  
177 abscission in the central bulge of the midbody.

178

### 179 **Midbody defects in fixed cortices of *Cep55* knockouts are consistent with delays in NSC abscission.**

180

181 Based on the specific localization of Cep55 to late-stage NSC midbodies, as well as the prior  
182 reports of a requirement for Cep55 in completion of abscission in cell lines, we hypothesized that  
183 microcephaly in *Cep55*<sup>-/-</sup> mice is due to a primary defect in abscission completion. However, the growth  
184 of the brain (albeit less than normal), and almost normal body size of *Cep55* knockouts suggest that  
185 abscission is completing in most cells. To begin to address whether abscission processes in *Cep55*<sup>-/-</sup>  
186 brains are normal, we used a fixed cortical slab preparation in which we can image and quantitatively  
187 analyze many NSCs undergoing mitosis and cytokinesis at the ventricular surface (**Figure 4A-B**) (Janisch  
188 & Dwyer, 2016; Janisch et al., 2013). By labeling the NSC apical cell junctions with ZO-1, we observe  
189 that *Cep55*<sup>-/-</sup> endfeet are more variable in size, with many abnormally large endfeet (**Figure 4C**). Indeed,  
190 quantification shows a striking decrease in the density of apical endfeet (**Figure 4D**). Since the apical  
191 membrane expands during mitosis, we quantified the apical mitotic index of NSCs, using phospho-  
192 histone H3 (PH3), but it is not altered in *Cep55*<sup>-/-</sup> cortices (**Figure 4C - left panels, E**), consistent with  
193 our finding in cross sections (**Figure 2H**). However, the midbody index, the percent of NSCs in  
194 abscission, is increased by approximately 25% at E14.5 (**Figure 4C - right panels, F**). These data  
195 suggest that in *Cep55* knockout cortices, NSCs may take longer to complete abscission. As the abscission  
196 process proceeds, midbodies mature by becoming thinner, and then forming constriction sites on each  
197 flank, where microtubule disassembly and membrane scission occurs (Guizetti et al., 2011). We observe  
198 fewer midbodies with constriction sites in *Cep55*<sup>-/-</sup> brains (**Figure 4G**), and more short midbodies  
199 (**Figure 4H**). There was no significant difference in midbody widths (data not shown). These data suggest  
200 that without Cep55, midbodies are able to compact their microtubules to become thinner as they mature,  
201 but have a defect in making the constriction sites, and abscission duration is longer than normal.

202 Since Cep55 protein is abundant in midbody remnants (MBRs) (**Figure 3A**), we investigated  
203 whether Cep55 loss alters MBR numbers at the apical membranes of NSCs, using Citron kinase (CitK) as

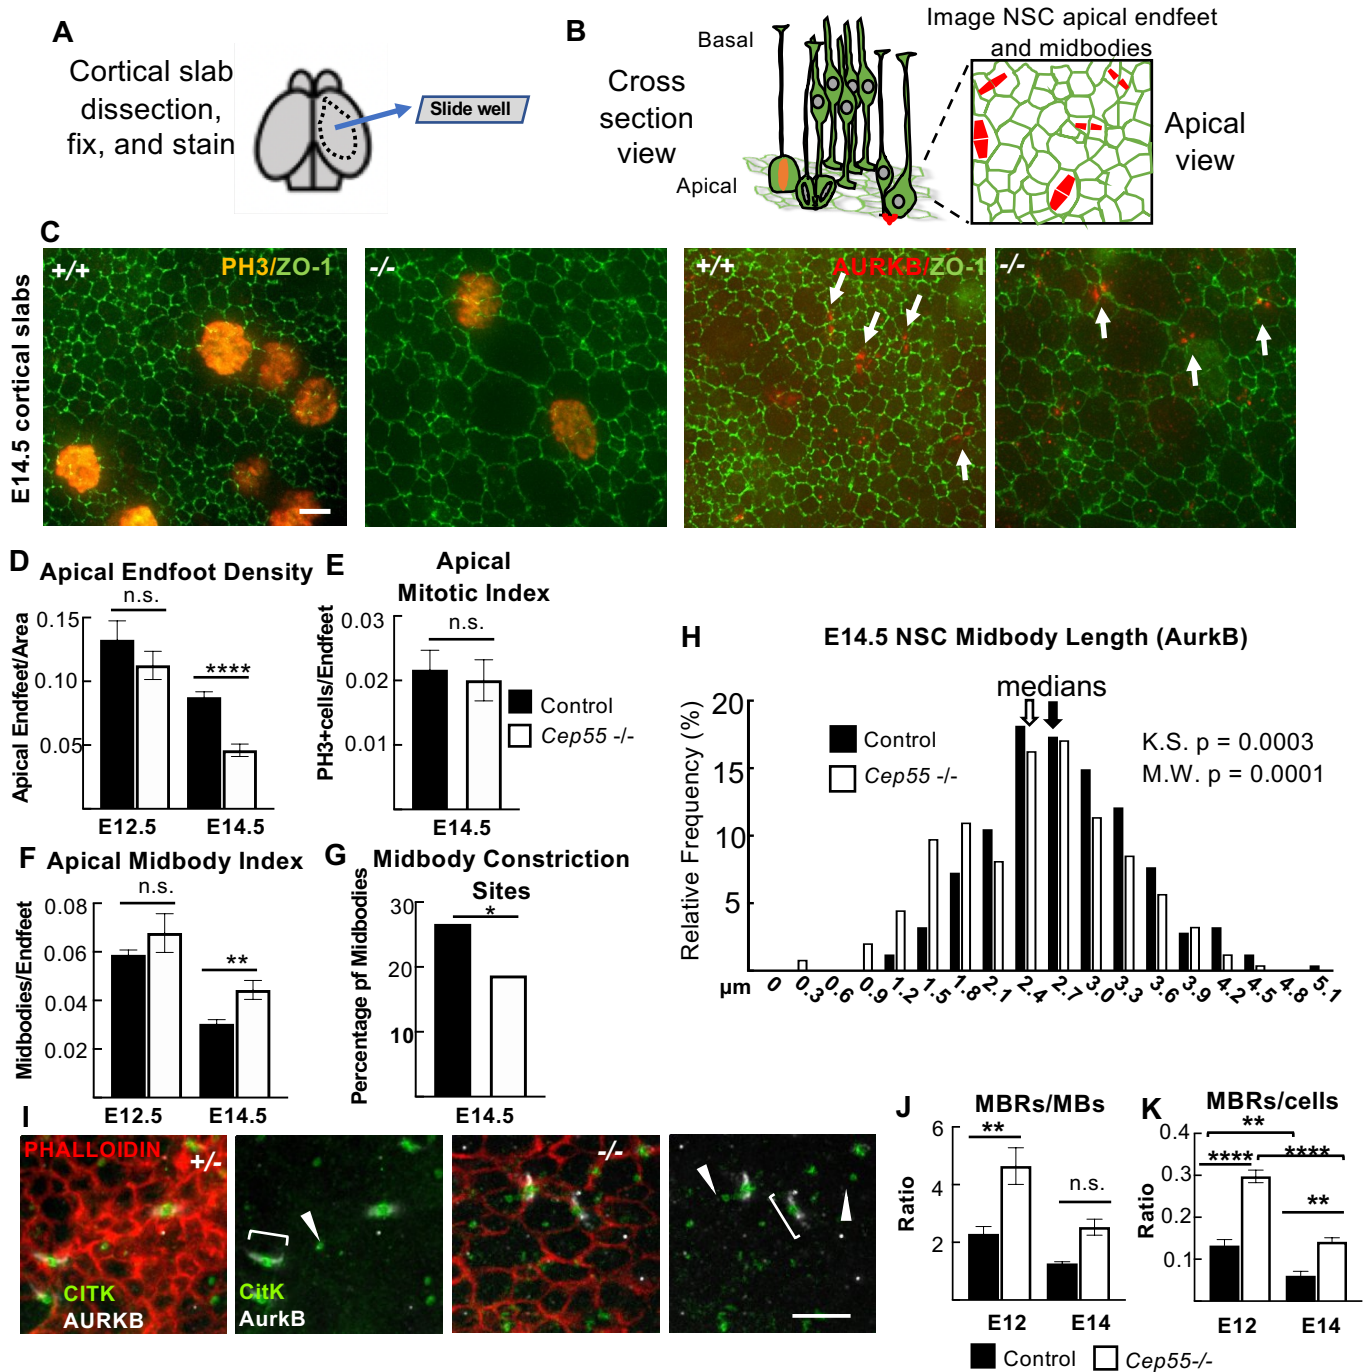

**Figure 4: *Cep55* knockouts display NSC midbody defects in cortical slab preparations.**

(A, B) Schematics of cortical slab dissection, and cross section vs. apical membrane views of NSCs undergoing cytokinesis. (C) E14.5 cortical slabs immunostained for apical junctions (ZO-1, Zona-Occludens-1), and mitotic chromatin (PH3+) or midbodies (AURKB, Aurora B kinase). (D) Mean apical endfoot density is reduced in *Cep55*<sup>-/-</sup> at E14.5. For D, E12.5: N = 4 +/+ slabs (4 brains), 4 -/- slabs (4 brains). E14.5: N = 8 control slabs (6 +/+, 2 +/- brains) and 7 -/- slabs (6 brains). (E-F) Mitotic index is normal, but midbody index is significantly increased at E14.5. For E, N = 6 control slabs (4 +/+, 2 +/- brains), 6 -/- slabs (5 brains). For F, E12.5: N = 4 +/+ slabs (4 brains), 4 -/- slabs (4 brains). E14.5: N = 6 control slabs (4 +/+, 2 +/- brains), 5 -/- slabs (5 brains). (G) A smaller percentage of *Cep55*<sup>-/-</sup> midbodies have visible constriction sites. (H) *Cep55*<sup>-/-</sup> midbodies tend to be shorter than controls (measured by AurkB immunolabeling). Medians: 2.7  $\mu$ m for +/+, 2.5  $\mu$ m for -/-. Bin = 0.3  $\mu$ m. For G, H, N = 353 control midbodies (5 +/+, 2 +/- brains), 246 -/- midbodies (5 brains) (I) E14.5 slabs immunostained for AurkB to mark pre-abscission midbody flanks (brackets), and citron kinase (CitK) to mark midbody bulges and post-abscission MBRs (arrowheads). (J, K) MBRs are increased in *Cep55*<sup>-/-</sup> brains, normalized to MB number or NSC (endfoot) number. For J, K, E12.5 and E14.5: N = 4 control slabs (2 +/+, 2 +/- brains), 4 -/- slabs (4 brains). Scale bars: B: 2  $\mu$ m I: 5  $\mu$ m. \*p < 0.05, \*\*p < 0.01, \*\*\*p < 0.001, \*\*\*\*p < 0.0001, n.s., not significant. D, F-G: Student's T-test, J, K: ANOVA, E: Fisher's exact test.

204 a marker (Ettinger et al., 2011; Gruneberg et al., 2006). Remarkably, there are approximately twice as  
205 many MBRs present on the apical membranes of *Cep55*<sup>-/-</sup> brains as in control brains, whether  
206 normalized to midbody number or cell number (**Figure 4I-K**). This could be another manifestation of  
207 delayed abscission, at a late stage when the flanks are no longer detectable with Aurora B staining. It  
208 could also represent a role of Cep55 in MBR disposal. Altogether, these analyses in fixed brains show  
209 midbody abnormalities that are consistent with delayed abscission of NSCs when Cep55 is absent.

210

### 211 **Cep55 knockout NSCs can complete microtubule disassembly, but it is delayed**

212

213 To directly test whether abscission is delayed or fails in NSCs of *Cep55*<sup>-/-</sup> cortex, we performed  
214 time-lapse imaging of abscission *in vivo*, in live cortical slab explants, using a method we developed  
215 previously (McNeely & Dwyer, 2020). By dissecting cortical slabs from embryonic brains of a  
216 membrane-GFP mouse line, and incubating them with the cell-permeable far-red fluorescent microtubule  
217 dye SiR-tubulin, we can image individual NSCs at the apical membrane undergoing cytokinesis from  
218 furrowing to abscission. As the cleavage furrow ingresses towards the apical membrane, the midbody  
219 forms as a tight bundle of microtubules, the central bulge becomes apparent, and then microtubule  
220 disassembly occurs on each midbody flank independently (**Figure 5A**). We previously showed that in  
221 control E13.5 NSCs *in vivo*, abscission takes on average 50 minutes to complete, with a wide range of  
222 times observed, and microtubule disassembly occurs on both sides of the midbody flank in the majority of  
223 divisions (McNeely & Dwyer, 2020).

224 Using this method, we quantified several aspects of the abscission process in *Cep55*<sup>-/-</sup> NSCs:  
225 midbody formation, midbody structure, and time to abscission (ascertained as microtubule disassembly)  
226 on one or both flanks. Unexpectedly, we find the vast majority (92%) of *Cep55*<sup>-/-</sup> NSCs are able to  
227 complete abscission. However, these knockout NSCs do have a significant increase in average time to the  
228 first abscission (delay of 23 minutes, **Figure 5B**). They are also able to complete bilateral abscissions:  
229 eighty percent of both control and *Cep55*<sup>-/-</sup> NSCs have observable second abscissions on the other  
230 midbody flank (**Figure 5C**). But again, the time to the second abscission is significantly increased in  
231 knockout NSCs (**Figure 5D**). Cumulative frequency plots illustrate the slower abscission kinetics in the  
232 *Cep55*<sup>-/-</sup> NSCs (**Figure 5E-F**).

233 We did observe a small number of *Cep55* knockout NSCs that displayed abnormalities at an  
234 earlier step of cytokinesis. Notably, there is a significant increase in the number of *Cep55*<sup>-/-</sup> NSCs that  
235 have tripolar mitotic spindles (7%, 6 out of 81 knockout NSCs imaged versus 0 out of 71 in controls)  
236 (**Figure 5G-H**). Of these 6 NSCs with tripolar spindles, four progressed into tripolar midbodies, which  
237 remarkably were still able to undergo microtubule disassembly, one regressed, and one drifted out of the

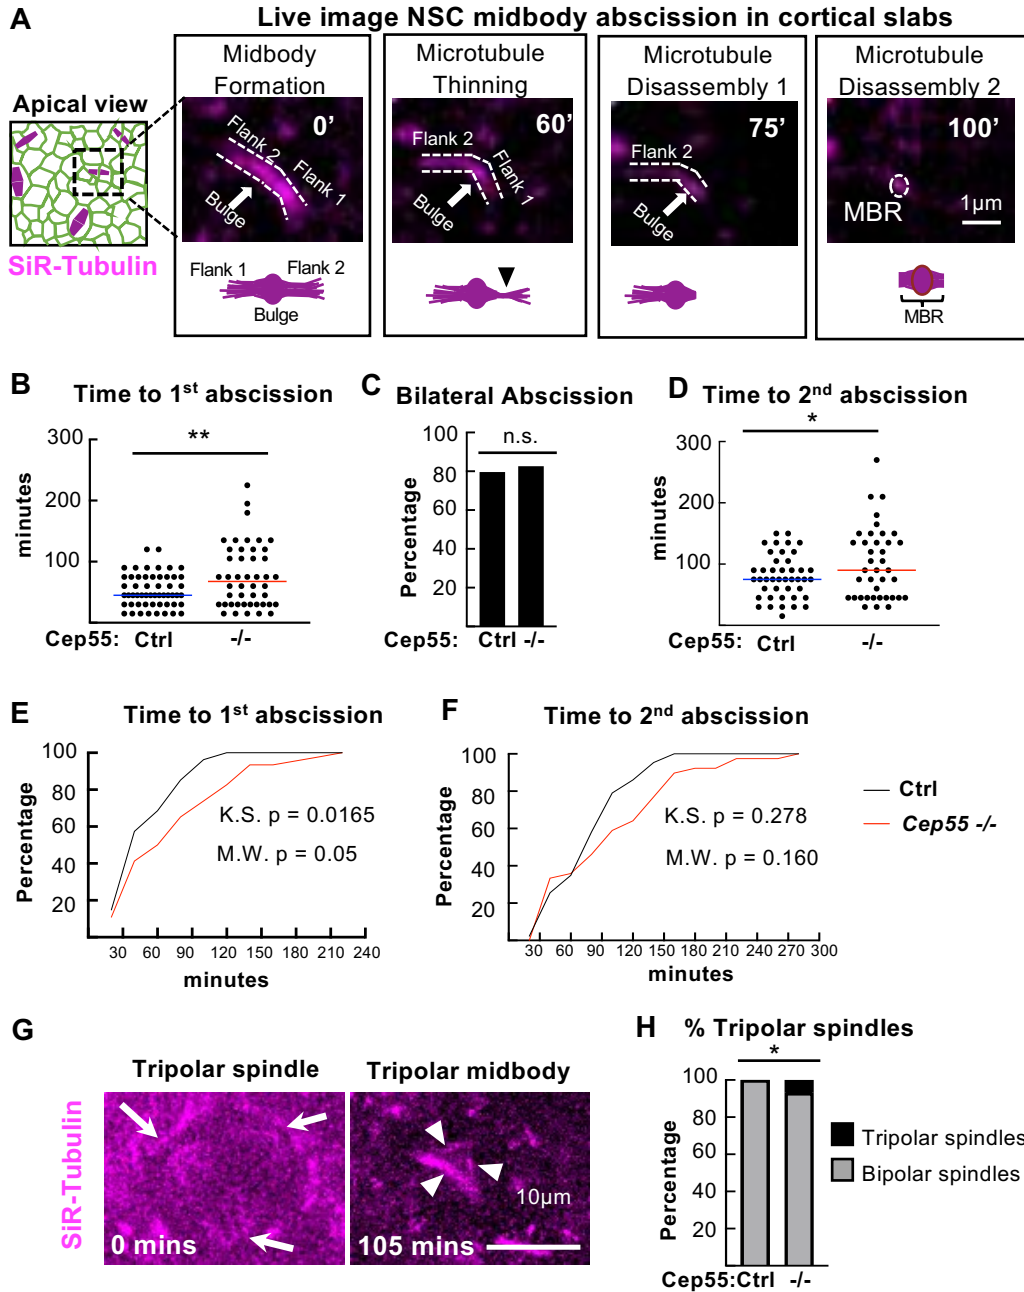

**Figure 5: *Cep55* knockout causes delayed midbody microtubule disassembly during NSC abscission.**

(A) Schematics and time-lapse images of an E13.5 NSC in a cortical slab explant undergoing midbody abscission. Microtubules are labeled by SiR-Tubulin. Distinct steps shown: midbody formation, flank 1 thinning, microtubule disassembly on flank 1 (1<sup>st</sup> abscission), and microtubule disassembly on flank 2 (2<sup>nd</sup> abscission). After bilateral flank disassembly, the midbody remnant (MBR) is left at the apical membrane. (B-D) Time from midbody formation to complete 1<sup>st</sup> abscission and 2<sup>nd</sup> abscission are increased in *Cep55*<sup>-/-</sup> NSCs, but there is no change in the percentage of bilateral abscissions detected. (E, F) Cumulative frequency plots for the 1<sup>st</sup> abscission and 2<sup>nd</sup> abscission show the curves are shifted to the right in *-/-* NSCs. (G) *Cep55*<sup>-/-</sup> NSC with a tripolar spindle (arrows point to spindle poles) proceeded to form a tripolar midbody at 105 minutes. (arrowheads point to midbody "flanks"). (H) Tripolar spindles are increased in *Cep55*<sup>-/-</sup> cortices. For B,C, E, N= 54 control cells (2 +/+, 1 +/- slabs), 46 *-/-* cells (4 slabs); D,F: N= 43 control cells, 39 *-/-* cells. G: N= 71 control cells (2 +/+, 1 +/- slabs) and 86 *-/-* cells (4 slabs). \**p*<0.05, \*\**p*<0.01. B,D: T-test. E,F: K-S and M-W tests. C,H: Fisher's Exact test.

238 imaging field. We observed a few *Cep55*<sup>-/-</sup> NSCs that had bipolar spindles that initiated a furrow but did  
239 not complete (4/50, compared to 0/54 control NSCs). In three of these NSCs, the furrow only partly  
240 ingressed then regressed, so the midbody never formed, while in the other, the midbody formed, but then  
241 the membrane regressed. Taken together with our preceding data on Cep55 protein localization and fixed  
242 midbody abnormalities, the findings indicate that the primary function of Cep55 in NSCs is to promote  
243 timely abscission, with particular effects on the kinetics of late steps such as constriction site formation  
244 and microtubule disassembly.

245

246 ***Cep55* knockout NSCs and MEFs have decreased but not eliminated ESCRT recruitment to late-**  
247 **stage midbodies.**

248

249 Since *Cep55*<sup>-/-</sup> NSCs have delayed abscission, and Cep55 is thought to recruit other abscission  
250 proteins, we wanted to determine if other known abscission proteins were altered. The current model for  
251 the mechanism of abscission, developed from mammalian cell lines and invertebrates, proposes that at the  
252 late stage of abscission, endosomal sorting complexes required for transport (ESCRT) components are  
253 recruited to the midbody, and then form helical filaments extending from the central bulge to constriction  
254 sites, compacting microtubules and pulling the plasma membrane close enough for membrane scission  
255 (Christ et al., 2017; Goliand et al., 2018; Guizetti et al., 2011; Stoten & Carlton, 2018). Cep55 is thought  
256 to be necessary to recruit this abscission machinery to the midbody in human cells through interactions  
257 with ESCRT-I/TSG101 and Alix. Then TSG101 and Alix both recruit ESCRT-III, which assemble into  
258 filaments (Carlton et al., 2008; Christ et al., 2016; Lee et al., 2008; Morita et al., 2007) (**Figure 6A**).  
259 Notably, Cep55 is absent in invertebrate genomes, yet their midbodies still recruit ESCRTs to mediate  
260 abscission. Therefore, we asked whether abscission in *Cep55*<sup>-/-</sup> NSCs is accomplished with or without  
261 the ESCRT machinery. First, we tested for the localization of endogenous Tsg101 and Alix in midbodies  
262 of control and *Cep55*<sup>-/-</sup> NSCs. Approximately one-third of control NSC midbodies have Alix or Tsg101  
263 present at the midbody center, reflecting that recruitment is temporally regulated and occurs only at late  
264 abscission stages. Among *Cep55*<sup>-/-</sup> NSC midbodies, however, only about 5% had detectable Alix and  
265 Tsg101 (**Figure 6B**). This suggests that in the absence of Cep55, ESCRT component recruitment may be  
266 delayed, or total protein recruitment may be decreased.

267 Next, we used MEFs to further analyze midbodies and ESCRT recruitment when Cep55 is absent,  
268 since MEF cells and midbodies are much flatter than NSCs and easier to image. Control MEFs exhibit  
269 identical Cep55 localization in late-stage midbodies as NSCs do (**Figure 3F**). Additionally, an antibody  
270 against the downstream ESCRT-III component, Chmp2a, works on MEFs (**Figure 6C**). Cep55 was  
271 previously suggested to be required for formation of the dense central midbody matrix in HeLa cells,



272 which appears as an unlabeled “dark zone” with alpha-tubulin or Aurora B antibody immunostaining  
 273 (Zhao et al., 2006). We tested this in MEFs, but the dark zones were equally detected in *Cep55* *-/-* MEFs  
 274 as controls (**Figure 6D**). *Cep55* *-/-* MEF midbodies had similar length and width to controls (data not  
 275 shown). Next, we tested Alix and Tsg101 recruitment, and found similarly to NSCs, the percentages of  
 276 *Cep55* *-/-* MEF midbodies with detectable endogenous Alix and TSG101 are significantly decreased  
 277 compared to controls (**Figure 6C, E**). There is also a trend for reduced midbodies with the ESCRT-III  
 278 component Chmp2a detectable (**Figure 6E**). Interestingly, if we just consider midbodies that have formed  
 279 constriction sites, about 40% of control MEFs have ESCRT localization, versus 15% of the *Cep55* *-/-*  
 280 MEFs, suggesting that constriction sites can form before or independently of ESCRT recruitment (**Figure**  
 281 **6F**).

282 Next, we asked whether the minority of *Cep55* *-/-* MEF midbodies with detectable ESCRTs had  
 283 normal distribution of that ESCRT within the midbody. We evaluated ESCRT protein signal intensity  
 284 using line scans drawn lengthwise along the midbody. In controls, a peak of ESCRT intensity is seen as  
 285 expected in the central matrix/ “dark zone” between the Aurora B stained flanks (**Figure 6G-I, controls**).  
 286 In *Cep55* *-/-* midbodies that had detectable Alix, the average peak intensity of Alix fluorescence is  
 287 significantly decreased, and the peak of intensity at the dark zone is lost (**Figure 6G**). Surprisingly, for  
 288 Tsg101-containing *Cep55* *-/-* midbodies, there is not a decrease but a slight increase in peak intensity of  
 289 Tsg101, and the intensity pattern is similar to controls (**Figure 6H**). We found a trend for decreased peak  
 290 Chmp2a fluorescence compared to controls (**Figure 6I**). This suggests the interesting possibility that Alix  
 291 and Tsg101 recruitment are affected differently by loss of Cep55. Together these data indicate that Cep55  
 292 is not essential for ESCRT component recruitment to the midbody in NSCs and MEFs, but suggests that  
 293 Cep55 may increase or accelerate their recruitment to ensure efficient abscission.

294

### 295 ***Cep55* knockout mice have increased numbers of binucleate cortical cells and MEFs**

296

297 Our analyses of midbodies and abscission in NSCs of the *Cep55* knockout so far suggest that  
 298 most NSCs can complete abscission in the absence of *Cep55*, but that the process is slower and a subset  
 299 of cells may fail. To assay cytokinesis success and failure in a larger sample of cells, we analyzed DNA  
 300 content of embryonic cortical cells with flow cytometry. Dissociating cells of E15.5 cortices and labeling  
 301 DNA with propidium iodide, we found 30% of *Cep55* *-/-* cortical cells have 4N DNA content compared  
 302 to 2% in controls, a 15-fold increase (**Figure 7A**). An increase in cells with 4N DNA content could come  
 303 from either an arrest in G2 /M phase, or failed cytokinesis resulting in formation of a binucleate or  
 304 tetraploid progenitor or neuron. Since we did not see significantly increased numbers of PH3+ cells in  
 305 *Cep55* *-/-* cortices (**Figure 2H**), this suggests the presence of binucleate/tetraploid cells. To investigate

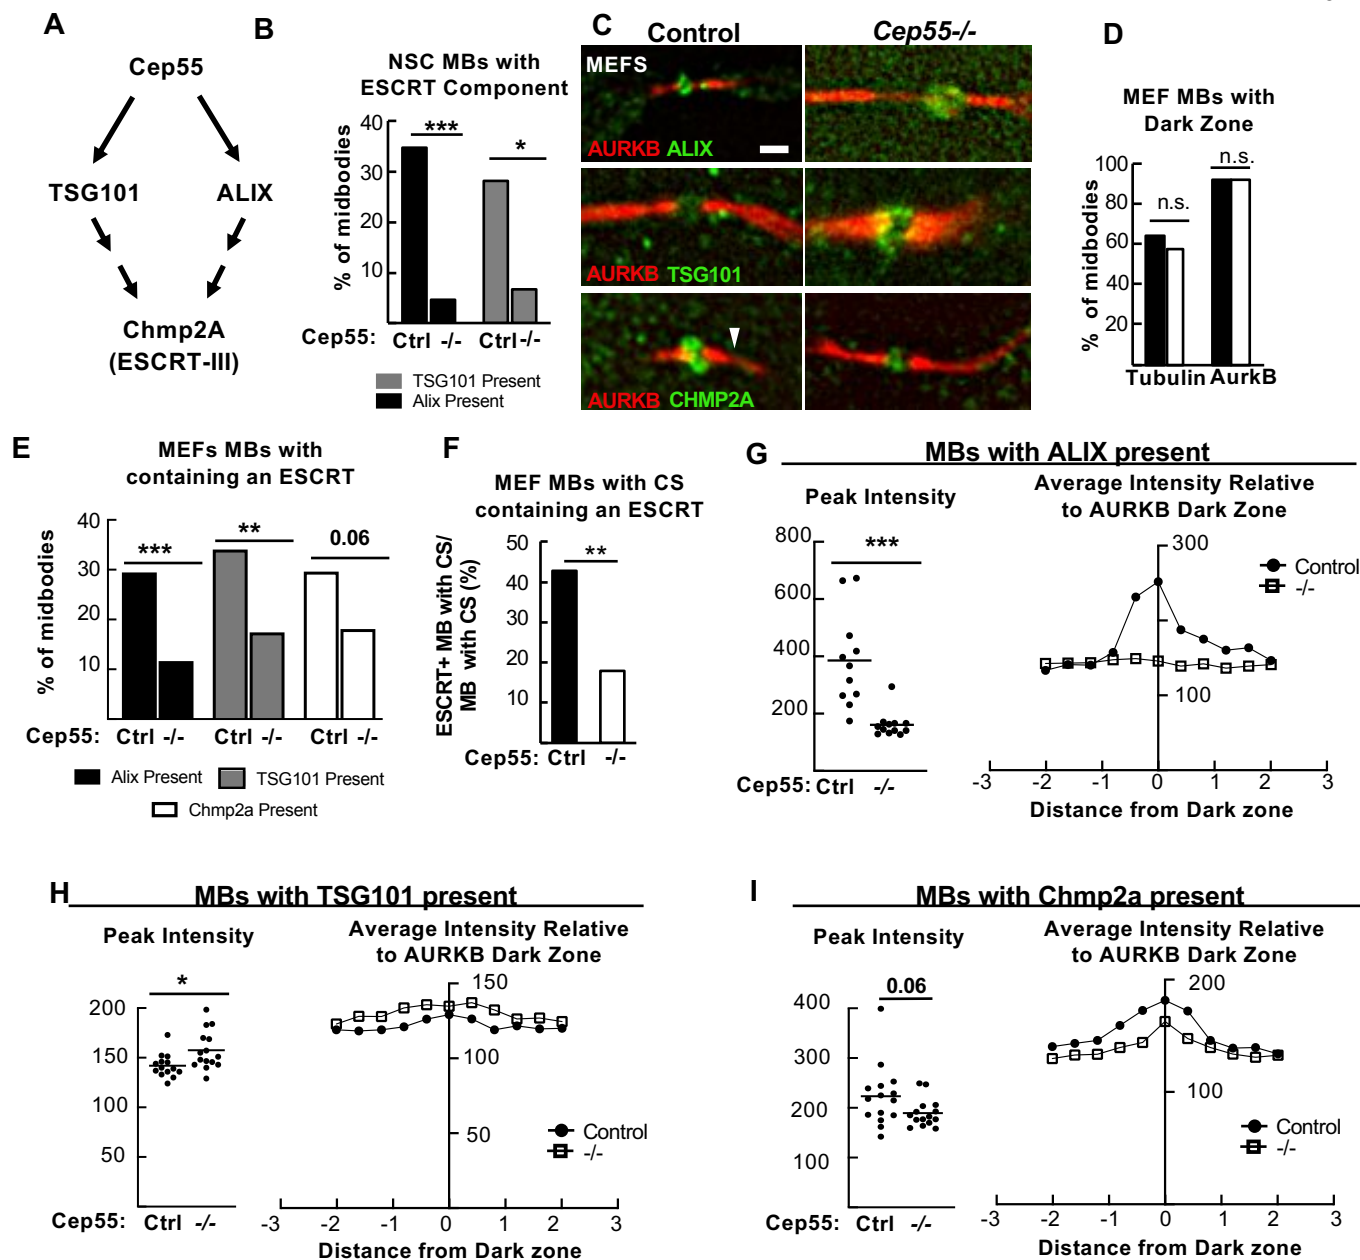

**Figure 6: *Cep55* knockout NSCs and MEFs have reduced but not eliminated ESCRT recruitment to midbodies.** (A) Model from literature for *Cep55* recruiting ESCRTs in midbodies (MBs). (B) *Cep55*<sup>-/-</sup> NSC midbodies are much less likely to have detectable Alix or TSG101. Alix: N= 49 NSC control MBs (3 animals, 3 coverslips); N= 46 *-/-* MBs (2 animals, 3 coverslips); TSG101: N= 32 control (2 animals, 2 coverslips), N= 45 *-/-* (3 animals, 3 coverslips). All E14.5 NSCs 1 DIV. (C) Representative images of MBs of Mouse embryonic fibroblasts (MEFs) cultured for 1 day, from control or *Cep55*<sup>-/-</sup> E14.5 embryos, immunostained for ALIX, TSG101, or Chmp2A. Arrowhead, constriction site. Scale Bar 1 $\mu$ m. (D) Central dark zones were detected at normal percentage in *-/-* MEF MBs, using alpha-tubulin or AurkB immunostaining. For D: N= 402 control, 355 *-/-* MBs (5 animals, 6 coverslips each). (E) *Cep55*<sup>-/-</sup> MEF midbodies are much less likely to have detectable Alix, TSG101, or Chmp2a than controls. Alix: N= 153 control, 129 *-/-* MBs (4 animals, 4 coverslips each); Tsg101: N= 141 control, 132 *-/-* MBs (4 animals, 4 coverslips each); Chmp2a: N= 108 control, 105 *-/-* MBs (3 animals, 3 coverslips each). (F) The percentage of MBs with constriction sites (CS) that contain detectable ESCRT is decreased in *-/-* MBs. N (midbodies with constriction sites) = 110 control, 95 *-/-*, (5 animals, 11 coverslips each). (G-I) MBs with ESCRT present were analyzed by fluorescence intensity linescans through the central dark zones. Alix peak is severely reduced in *-/-* MBs, but Tsg101 and Chmp2a peaks are not. Alix: N=11 control, *-/-* MBs (2 animals, 2 coverslips, 1 experiment); Tsg101: N=14 control, 15 *-/-* MBs (2 animals, 2 coverslips, 1 experiment); Chmp2a: N= 15 control, *-/-* MBs (2 animals, 2 coverslips, 1 experiment). \* p < 0.05; \*\* p < 0.01; \*\*\* p < 0.001. C-G: Fisher's exact test; H-J: Student's t-test.

306 whether cells with 4N DNA content were progenitors or neurons, we used Ki67 and DAPI co-labeling to  
307 differentiate cycling progenitor cells (Ki67+) from non-cycling neurons (Ki67-) cells. Interestingly, we  
308 observed an increased 4N DNA peak in both Ki67+ (**Figure 7B**) and Ki67- *Cep55* -/- cells (**Figure 7C**).  
309 In controls, there is no 4N DNA peak in Ki67-negative cells, because neurons are post-mitotic (**Figure**  
310 **7C, left**). These data suggest that in *Cep55* -/- cortices, there are significant numbers of binucleate  
311 neurons and NSCs.

312 To further investigate whether there are binucleate NSCs and/or neuron populations in *Cep55* -/  
313 cortices, we imaged dissociated, cultured cortical cells from E14.5 cortices. We used Nestin  
314 immunostaining to mark NSCs, and actin (phalloidin) and DAPI staining to differentiate cells with one or  
315 two nuclei. Indeed, we observed increased percentages of binucleate cells in *Cep55* -/- cultures, including  
316 approximately 24% of NSCs (Nestin+) and 12% of neurons (Nestin-) (**Figure 7D-F**). These data show  
317 that *Cep55* knockout results in significant numbers of binucleate NSCs and neurons in the brain.

318 Since the brain size is more severely affected than body size in *Cep55* knockouts (**Figure 1D**),  
319 We wondered whether binucleation is a consequence of *Cep55* loss in non-neural cell types too. *Cep55* is  
320 localized in embryonic fibroblast midbodies in a similar distribution as seen in NSCs (**Figure 3F**), and its  
321 loss causes decreased recruitment of ESCRTs (**Figure 6E**). Indeed, we do observe a doubling of  
322 binucleate cells in *Cep55* -/- MEF cultures compared to controls (**Figure 7G, H**). Thus, while not as  
323 dramatic as seen in NSC cultures, *Cep55* loss does lead to binucleation in MEFs as well.

324

### 325 **Apoptotic cells are increased in *Cep55* knockout neural but not non-neural tissues during** 326 **embryogenesis**

327

328 Abscission defects and binucleation have been linked to apoptosis of NSCs and neurons in other  
329 genetic mouse microcephaly mutants (Bianchi et al., 2017; Little & Dwyer, 2019; Moawia et al., 2017).  
330 The disorganization and reduced cell numbers we noted in *Cep55* -/- cortices suggest some cells could be  
331 dying. To assay for apoptosis, we labeled cortical sections with antibodies to cleaved-caspase 3 (CC3). In  
332 control developing cortex, apoptotic cells are only rarely detected, but there is a striking increase in  
333 apoptotic cells in *Cep55* -/- cortices (**Figure 8A**). Apoptosis is most increased in the proliferative zones,  
334 but is also increased in the cortical plate (cp, neuronal layer) (**Figure 8B**). This suggests widespread  
335 apoptosis in multiple cortical cell types, with the highest increase in dividing cell types, NSCs and BPs.  
336 Since brain size is already significantly decreased at E14.5, we looked at an earlier age for apoptosis.  
337 Indeed, apoptosis is dramatically increased in *Cep55* -/- cortical epithelium at E10.5, when the cortex  
338 consists only of NSCs (**Figure 8C-D**). Therefore, we conclude that apoptosis of primarily NSCs but also  
339 neurons contributes to impaired cortical growth.

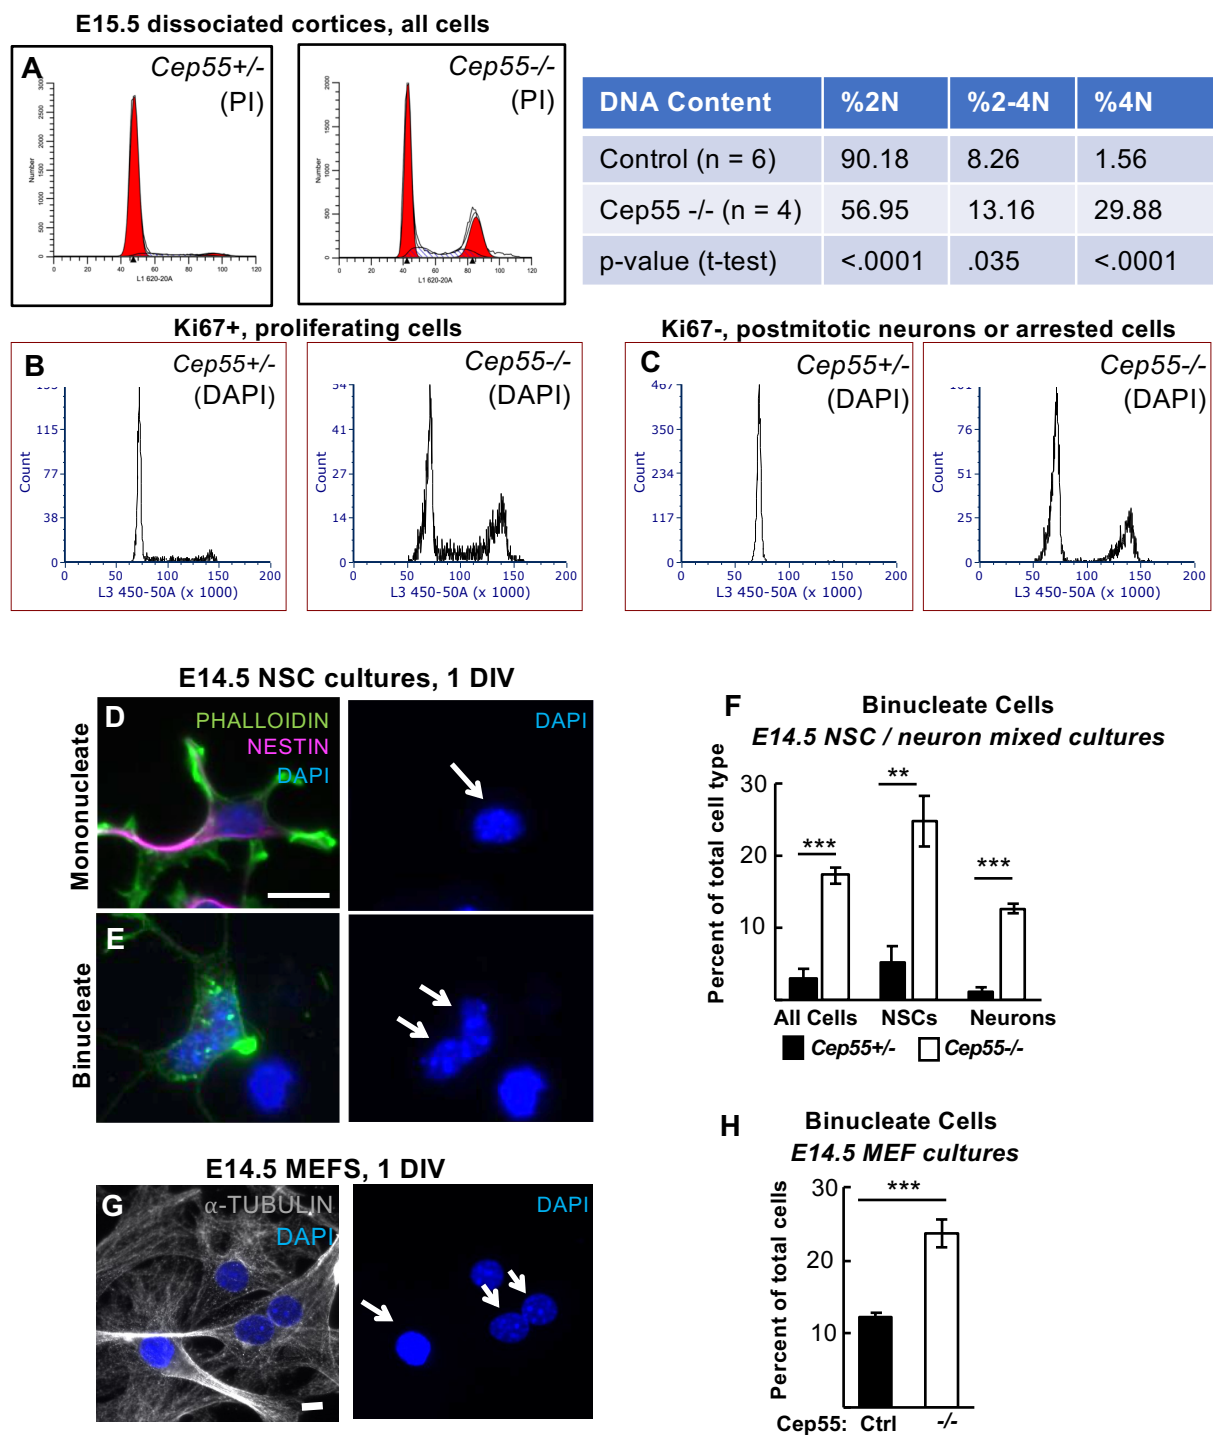

**Figure 7: *Cep55* knockout mice have increased numbers of binucleate cortical cells and MEFs.**

(A) Flow cytometric analysis of E15.5 dissociated cortices labeled with propidium iodide (PI) indicates an increase in cells with tetraploid (4N) DNA content in *Cep55*<sup>-/-</sup> brains, and concomitant decrease in cells with 2N DNA content. (B-C) Both proliferating (Ki67<sup>+</sup>) and non-proliferating (Ki67<sup>-</sup>, presumed neurons) populations of *Cep55*<sup>-/-</sup> brains show increases in 4N DNA cells. (D-F) Increased numbers of binucleate progenitors (Nestin<sup>+</sup>) and neurons (Nestin<sup>-</sup>) are seen in *Cep55*<sup>-/-</sup> dissociated cortical cultures at 1 day in vitro (DIV). D, arrow: example of mononucleate progenitor. E, arrow: example of binucleate neuron. (G-H) Primary cultures of mouse embryonic fibroblasts (MEFs) from *Cep55*<sup>-/-</sup> embryos have twice as many binucleate cells as control cultures at 1DIV. Arrow: example of mononucleate cell, double arrow: example of binucleate cell. For (A) n = 6 *Cep55*<sup>+/+</sup> and 4 *Cep55*<sup>-/-</sup> dissociated cortices; (B-C) n = 5 *Cep55*<sup>+/+</sup> and 5 *Cep55*<sup>-/-</sup> dissociated cortices; (F) n = 4 *Cep55*<sup>+/+</sup> and 4 *Cep55*<sup>-/-</sup> coverslips from 2 embryos each. (H) n = 5 *Cep55*<sup>+/-</sup> and 5 *Cep55*<sup>-/-</sup> coverslips from 3 embryos each. n.s.; \*\* p < 0.01; \*\*\* p < 0.001. Scale bars in D and G, 10 μm.

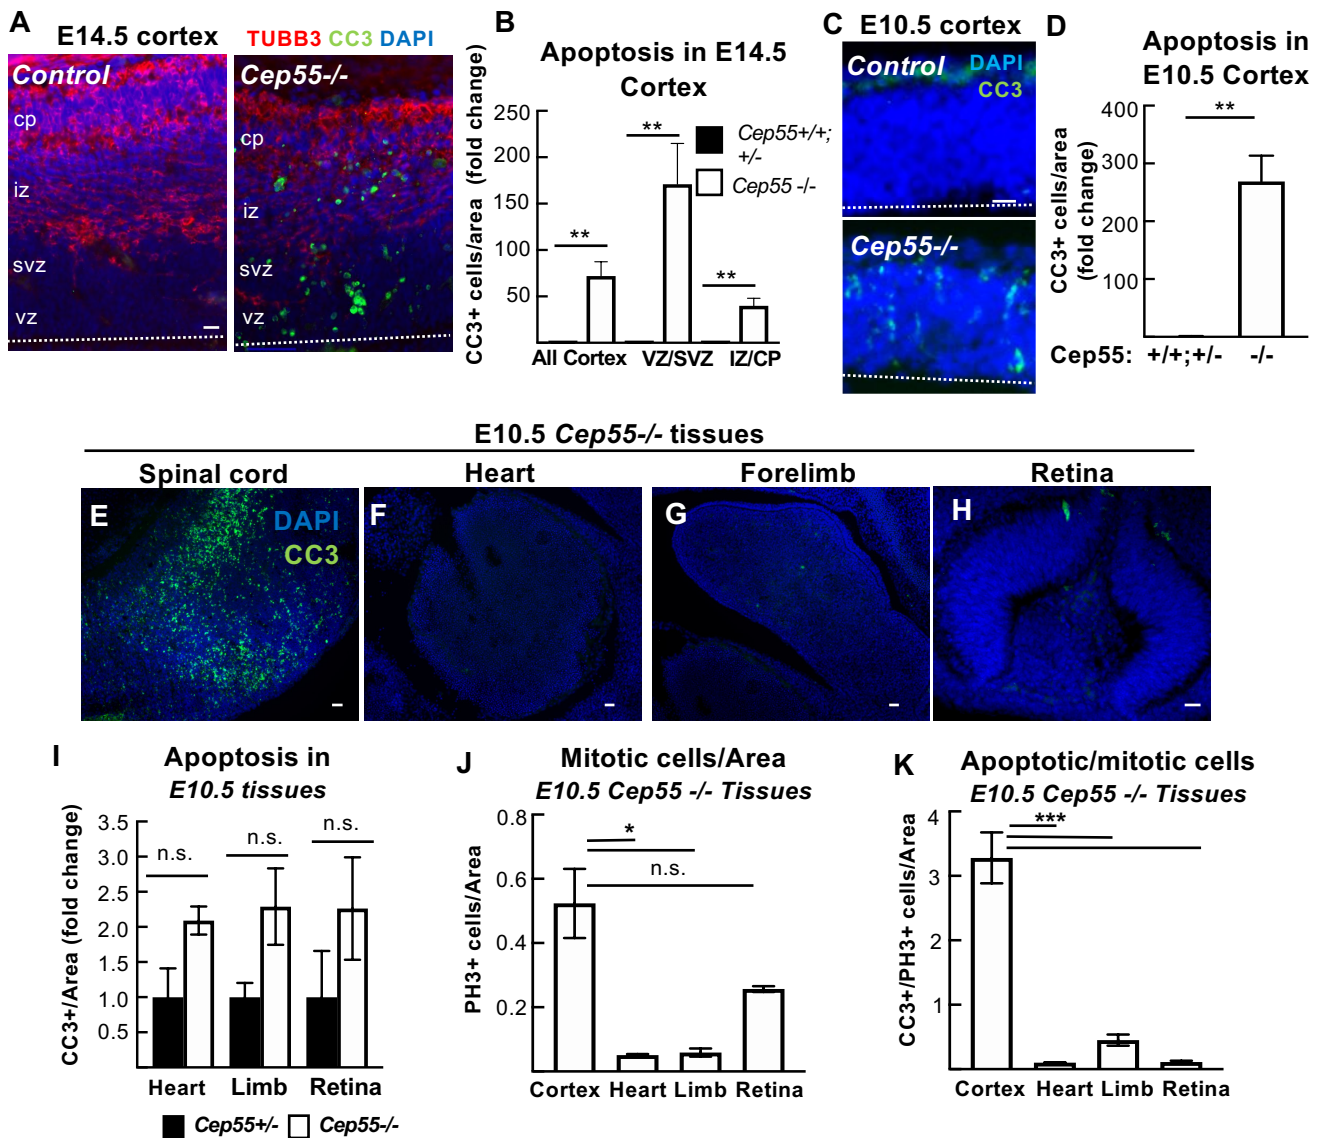

**Figure 8: Apoptosis is greatly increased in the neural tissue of *Cep55* knockout embryos.**

(A) Cortical sections immunostained for apoptotic cell marker cleaved-caspase 3 (CC3, green) show almost no CC3+ cells in control but many in *Cep55*<sup>-/-</sup> cortex. (B) At E14.5, apoptotic cells were most increased in the vz/svz, containing nuclei of NSCs and BPs, but also increased in neurons in cp/iz of *-/-* brains. (C-D) At E10.5, prior to neurogenesis, apoptosis is greatly increased in *-/-* forebrain NSCs. (E-I) Apoptosis is high in the E10.5 *-/-* spinal cord, (and midbrain and hindbrain, not shown), but not in heart, forelimb, or retina. (J-K) The brain specificity of the apoptosis is not simply due to higher mitotic index. Dashed line in A,C = apical membrane. For all experiments, n = 3 control and *-/-* brains or embryos at each age. Scale bars: (A): 20  $\mu$ m (C): 20  $\mu$ m, (D): 40  $\mu$ m, (E): 40  $\mu$ m, (I) 20  $\mu$ m. \* p < 0.05, \*\* p < 0.01, \*\*\* p < 0.001. n.s., not significant. All experiments, Student's t-test.

340 We wondered whether a lack of apoptosis in non-cortical tissues could explain the less severe  
341 body size in *Cep55*<sup>-/-</sup> mice compared to brain size. Alternatively, apoptosis could occur in these tissues,  
342 but proliferation increases to compensate. To address this question, we labeled E10.5 whole-embryo  
343 sections with CC3. Interestingly, apoptosis is observed throughout central nervous system tissues (**Figure**  
344 **8E**, spinal cord, and hindbrain and midbrain, not shown) but is not seen in the rest of the body, including  
345 the heart precursor (**Figure 8F**), the forelimb (**Figure 8G**), and the retina (**Figure 8H**); quantification  
346 (**Figure 8I**). There are many more mitotic cells in the developing cortex than in these tissues in both  
347 controls (data not shown) and *Cep55*<sup>-/-</sup> mice (**Figure 8J**); however, even when normalized to the number  
348 of mitotic cells, apoptosis is specifically increased in the *Cep55*<sup>-/-</sup> cortex, not in the other tissues (**Figure**  
349 **8K**). These data suggest the interesting possibility that a distinct apoptotic response occurs in central  
350 nervous system tissues after *Cep55* loss, that does not occur in all proliferating tissues.

351

352 **p53 nuclear expression is increased in *Cep55* knockout binucleate cortical cells, but not in**  
353 **binucleate MEFs**

354

355 We previously showed that NSC apoptosis in a different abscission mutant, in the kinesin Kif20b,  
356 was mediated by the tumor suppressor p53 (Little & Dwyer, 2019). To determine whether p53 elevation  
357 occurs in *Cep55*<sup>-/-</sup> cortices, we labeled E14.5 cortical sections with antibodies to p53. Indeed, while  
358 virtually no cells with bright nuclear p53 accumulation are observed in control sections, greatly increased  
359 numbers of p53<sup>+</sup> cells are seen in *Cep55*<sup>-/-</sup> sections (**Figure 9A-B**). We noticed these cells throughout  
360 the cortex, but especially increased in proliferative zones (vz/svz). While some p53 positive cells appear  
361 singular, others appear paired (**Figure 9A, arrows**). To further delineate in which *Cep55*<sup>-/-</sup> cells p53  
362 expression occurred, we used dissociated cortical cell cultures. We observed a 5-fold increase in the  
363 number of cells with a nuclear:cytoplasmic (N:C) ratio of 2 or greater, indicative of p53 activation as it  
364 acts in the nucleus (**Figure 9C-D**).

365 Interestingly, just as apoptosis is increased in both NSCs and neurons in *Cep55*<sup>-/-</sup> cortex, we  
366 found increased nuclear p53 expression in both cell types (**Figure 9D**). While cytokinetic defects would  
367 occur only in dividing NSCs, we reasoned that a failed cytokinesis event could result in the formation of a  
368 binucleate daughter cell, either progenitor cell or neuron. Indeed, we had observed both binucleate NSCs  
369 and neurons in *Cep55*<sup>-/-</sup> cultures (**Figure 7F**). To investigate if binucleation was associated with p53  
370 activation and apoptosis in progenitor cells and neurons, we co-labeled cells with Nestin, Phalloidin and  
371 p53. Indeed, there is an increased nuclear:cytoplasmic ratio of p53 expression in binucleate *Cep55*<sup>-/-</sup>  
372 NSCs and neurons compared to mononucleate cells (**Figure 9E**). Furthermore, almost no mononucleate  
373 cells have p53 N:C ratios > 2, while more than 50% of binucleate progenitors and 20% of binucleate

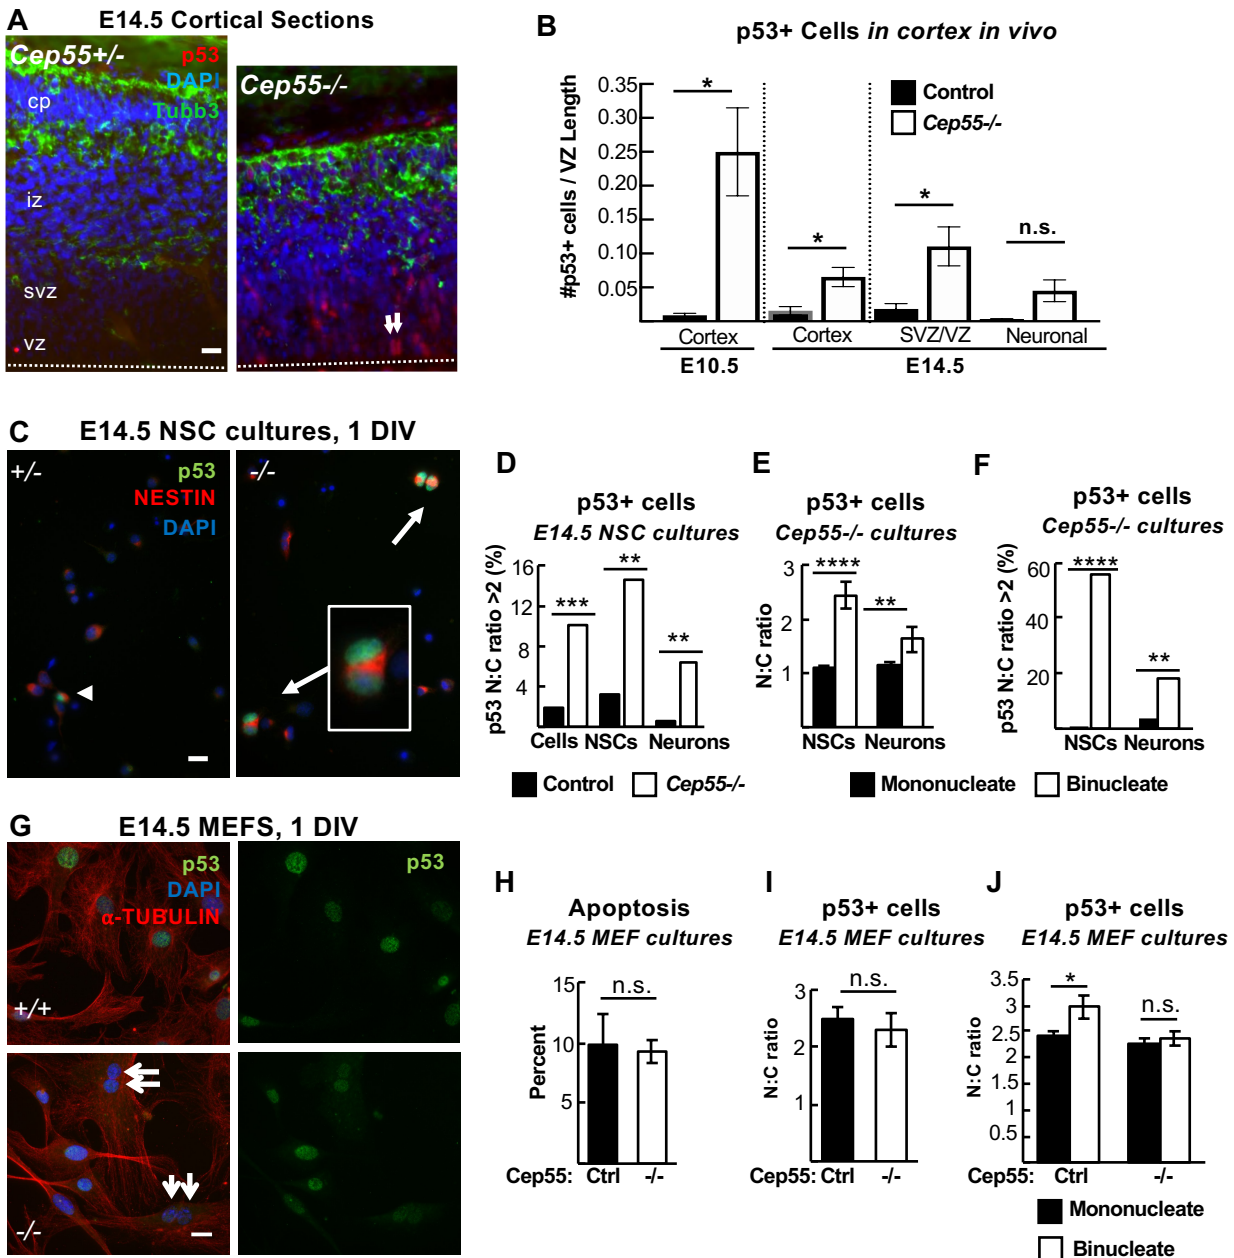

**Figure 9. p53 nuclear accumulation is increased in *Cep55* knockout binucleate NSCs and neurons, but not in binucleate MEFs.**

(A-B) Cortical sections immunostained for p53 and Tubb3 show almost no p53+ cells in controls but many in *Cep55*<sup>-/-</sup> cortices. Arrows, paired nuclei with p53 expression. **B.** p53+ cell counts are increased in *Cep55*<sup>-/-</sup> cortices at E10.5, and at E14.5, mostly in the vz/svz than neuronal layers **(C)** Images of dissociated NSC cultures show p53+ binucleate NSCs from *Cep55*<sup>-/-</sup> cortices. **(D)** Counts of cells with a p53 nuclear:cytoplasmic (N:C) ratio of >2 are greatly increased in *-/-* cultures, both NSCs and neurons. **(E-F)** In *Cep55*<sup>-/-</sup> NSC cultures, the mean N:C ratio of p53 intensity is about 1 in mononucleate NSCs or neurons, but significantly higher in binucleate progenitors and neurons. **(F)** In *Cep55*<sup>-/-</sup> cultures, over half of binucleate NSCs have a p53 N:C ratio > 2, compared to only 1% of mononucleate NSCs. Among binucleate neurons, ~ 20% have a p53 N:C ratio of >2 versus only 2% of mononucleate neurons. **(H)** Apoptosis (CC3+) is not increased in *Cep55*<sup>-/-</sup> primary MEF cultures compared to controls. **(I)** The N:C ratio of p53 signal (p53, green, G) is not different in *-/-* MEFs compared to controls. **(J)** Binucleate *Cep55*<sup>-/-</sup> MEFs did not have an increased p53 N:C ratio compared to mononucleate *-/-* MEFs (G, arrows). Dashed line in A = apical membrane For B, n = 3 *Cep55*<sup>+/+;+/-</sup> and 3 *Cep55*<sup>-/-</sup> mice at each age. For D-F, n = 4 *Cep55*<sup>+/+;+/-</sup> and 4 *Cep55*<sup>-/-</sup> coverslips from 2 embryos each; 124 control and 137 *-/-* NSCs; 143 *-/-* and 184 *-/-* neurons for N:C ratios. For H, n = 3 control and 3 *Cep55*<sup>-/-</sup> coverslips from 3 embryos each. For I, n = 195 control and 232 *-/-* cells from 3 control and *Cep55*<sup>-/-</sup> coverslips and embryos each. For J, n = 153 mononucleate and 25 binucleate control cells and 158 mononucleate and 68 binucleate *-/-* cells from 3 coverslips and 3 embryos each. Scale bars in A, C, G represent 20  $\mu$ m. \* p < 0.05; \*\* p < 0.01; \*\*\* p < 0.001; \*\*\*\* p < 0.0001, t-test.

374 neurons do (**Figure 9F**). These data suggest the existence of a p53-dependent pathway for apoptosis of  
375 binucleate cells in the cortex, that may be most sensitive in NSCs.

376 Our previous figures showed that apoptosis is increased in the brain but not body tissues of *Cep55*  
377 knockouts. *Cep55*<sup>-/-</sup> MEFs have defective ESCRT recruitment during abscission, and increased  
378 binucleation. Therefore, we asked whether they also had increased p53 expression or apoptosis.  
379 Surprisingly, the answer appears to be no, neither apoptosis nor p53 levels are increased in *Cep55*<sup>-/-</sup>  
380 MEF cultures (**Figure 9G-I**). Furthermore, binucleate *Cep55*<sup>-/-</sup> MEFs do not have any detectable  
381 difference in p53 expression compared to mononucleate MEFs (**Figure 9J**). These data suggest the  
382 possibility that the p53-dependent apoptotic response to binucleation/tetraploidy, and/or its consequences,  
383 is regulated differently in various cell types, contributing to the dramatic tissue-level differences in  
384 phenotypic severity observed in germline *Cep55* knockouts.

385

### 386 ***Cep55* knockout forebrain apoptosis and size but not body size and longevity are p53-dependent.**

387

388 To test the hypothesis that p53 activation is the cause of apoptosis and microcephaly in *Cep55*<sup>-/-</sup>  
389 mice, we crossed the *p53* knockout to the *Cep55* knockout. Mouse knockouts of *p53* have normal brain  
390 size and structure at birth, with almost no consequences for development (Insolera et al., 2014; Jacks et  
391 al., 1994). As expected, *Cep55*<sup>-/-</sup> mice with wild-type p53 status exhibit microcephaly (**Figure 10A,**  
392 **second panel**). We detected no difference in brain size with heterozygous deletion of p53 (**Figure 10A,**  
393 **third panel**). However, complete deletion of p53 partially rescues brain size (**Figure 10A, right-most**  
394 **panel), and B, C**). *Cep55;p53* double knockout cortical length is 21% longer than *Cep55*<sup>-/-</sup>, but still  
395 10% shorter than wild-type controls (**Figure 10B**). Furthermore, cortical area is 32% larger than *Cep55*<sup>-/-</sup>  
396 <sup>-/-</sup>, but still 19% smaller than wild-type controls (**Figure 10C**). Next, we evaluated whether deletion of  
397 p53 prevents apoptosis in the *Cep55* knockout. Indeed, apoptosis in *Cep55*<sup>-/-</sup> mice is p53-dependent  
398 (**Figure 10D-E**). Therefore, preventing apoptosis partially rescues brain size in *Cep55*<sup>-/-</sup> mice, but not to  
399 wild-type size. These results highlight the importance of Cep55 function for sufficient NSC proliferation,  
400 as even with apoptosis inhibition in *Cep55* knockouts brain growth is impaired.

401 We earlier noted that *Cep55*<sup>-/-</sup> mice suffer postnatal lethality starting in the second week of life,  
402 and have reduced body size at birth and poor postnatal growth (**Figure 1 – supplemental figure 1A, B**).  
403 Therefore, we wanted to investigate whether lethality or body size are improved in *Cep55;p53*<sup>-/-</sup> mice, as  
404 brain size is. Surprisingly, the postnatal survival curve of *Cep55;p53*<sup>-/-</sup> mice is not improved compared  
405 to *Cep55*<sup>-/-</sup> single knockouts (**Figure 10F**). Furthermore, body weight and size are still severely reduced  
406 in *Cep55;p53*<sup>-/-</sup> pups, similar to *Cep55*<sup>-/-</sup> (**Figure 10G, H**). Thus, it appears there are disparities in both



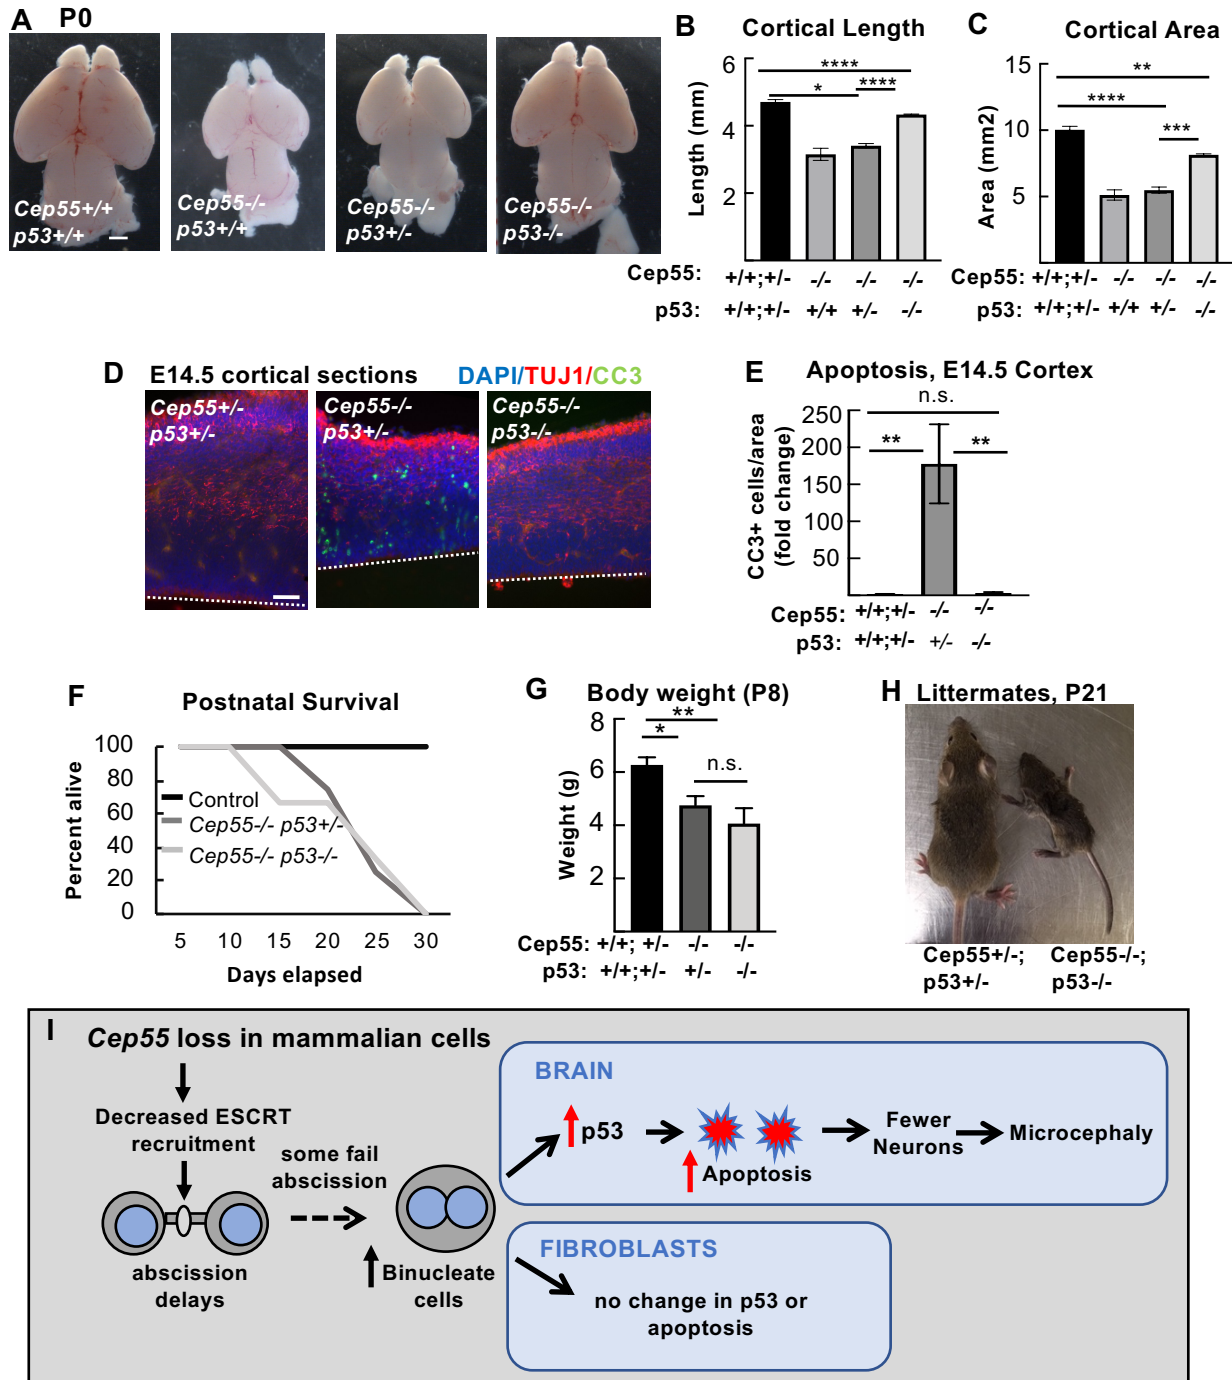

**Figure 10. *p53* deletion blocks apoptosis and partially rescues brain size, but not body size or survival in *Cep55* knockout pups.**

(A-C) Co-deletion of *p53* partially rescues microcephaly in *Cep55*  $-/-$  mice. (B-C) Homozygous *p53* knockout shows partial rescue of *Cep55*  $-/-$  cortical length and area. (D-E) Apoptosis of *Cep55*  $-/-$  cortex is fully blocked in *Cep55*;*p53* double knockouts. Dashed line in D = apical membrane. (F-H) *p53* co-deletion does not improve *Cep55*  $-/-$  pups' postnatal survival (F) or body weight (G,H). For B,C; n=11 controls (*Cep55*+/+,*p53*+/+,*p53*+/+), 2 *Cep55*  $-/-$ ;*p53*+/+, 5 *Cep55*  $-/-$ ;*p53*+/-, 3 *Cep55*  $-/-$ ;*p53*  $-/-$ . For E, n=3 controls *Cep55*+/+,*p53*+/+,*p53*+/+, 2 *Cep55*  $-/-$ ;*p53*+/+, 3 *Cep55*  $-/-$ ;*p53*  $-/-$ . For F and G, n=15 controls, 4 *Cep55*+/+;*p53*  $-/-$  and 3 *Cep55*  $-/-$ ;*p53*  $-/-$ . \*  $p < 0.05$ , \*\*  $p < 0.01$ , \*\*\*  $p < 0.001$ , \*\*\*\*  $p < 0.0001$ , n.s., not significant. B,C,F: one-way ANOVA. E: one-way ANOVA, Tukey's multiple comparisons test. (I) Working model for the effects of *Cep55* loss on abscission of mammalian cells, and for the differential effects on neural stem cells versus fibroblasts. *Cep55*  $-/-$  mouse cells have impaired ESCRT recruitment and abscission delay. Most cells complete abscission, but at least some fail to complete cytokinesis resulting in increased binucleate cells. Binucleate NSCs and neurons have elevated *p53* expression, but not binucleate MEFs. *p53* activation in NSCs and neurons causes apoptosis in *Cep55* ko cortices, which partially accounts for microcephaly.

407 the consequences of *Cep55* loss for development of different tissues in the animal, and in the degree to  
408 which p53 co-deletion rescues brain versus body size.

409

## 410 **Discussion**

411 In this work we investigated the roles of the cytokinetic abscission regulator *Cep55* in embryonic  
412 development, particularly in the brain. Data from cell lines had led to a general model in vertebrate cells  
413 that *Cep55* was critical for the recruitment of ESCRT components to the midbody, to complete  
414 abscission. It was perhaps expected that knockout of *Cep55* would cause early embryonic lethality, as  
415 knockout of another cytokinesis gene, *mgcRacGAP* does (Van de Putte et al., 2001). However, we find  
416 that while some cells fail abscission in the absence of *Cep55*, most succeed, and embryos develop and  
417 survive past birth. ESCRT recruitment is indeed severely reduced in most *Cep55* *-/-* midbodies, but it is  
418 not abolished. We find *Cep55* acts to ensure the speed and success rate of abscission (**Figure 10 I**). This  
419 function of *Cep55* appears to be especially important in NSCs, because it is essential for proper brain  
420 growth. NSCs that fail abscission and become binucleate activate p53 and apoptosis, but embryonic  
421 fibroblasts do not. Consistent with this, p53 co-deletion to prevent apoptosis partially rescues *Cep55* *-/-*  
422 brain size, but not body size. Our work emphasizes the need for understanding specialized requirements  
423 for abscission regulation in different types of stem cells and growing tissues, and tissue-specific apoptotic  
424 responses to abscission stress.

425 Knockout of *Cep55* enabled us to test the model that *Cep55* is required to recruit ESCRT  
426 components to the midbody, via interactions with Alix and Tsg101 (Carlton et al., 2008; Carlton &  
427 Martin-Serrano, 2007; Lee et al., 2008; Morita et al., 2007; Stoten & Carlton, 2018) and that this  
428 recruitment is necessary for abscission completion. Abscission includes both membrane scission and  
429 microtubule disassembly to sever the intracellular bridge; ESCRT components, recruited by *Cep55*, are  
430 thought to be necessary to couple these processes together temporally, by directly mediating membrane  
431 scission and recruiting the microtubule-severing protein spastin (Guizetti et al., 2011; Steigemann et al.,  
432 2009). Our findings appear to challenge two aspects of this model. First, we find correctly localized  
433 ESCRT components in some *Cep55* *-/-* midbodies, suggesting *Cep55* is not the sole recruiter of ESCRTs  
434 to the midbody in vertebrate cells. Second, we find that without *Cep55*, microtubule disassembly during  
435 abscission does not fail but is only delayed. In HeLa cell cultures, *Cep55* depletion caused greatly  
436 increased midbody index, and cells remained at midbody stage for hours before either regressing or  
437 finally succeeding (Fabbro et al., 2005; Zhao et al., 2006). By contrast, in NSCs *in vivo*, we only observed  
438 a small increase in midbody index, and only a slight delay in microtubule disassembly in *Cep55* *-/-* brains.  
439 These findings suggest the intriguing possibility that microtubule disassembly and membrane scission are  
440 uncoupled in the *Cep55* *-/-* mouse, and that membrane scission is more severely delayed. It is possible

441 that microtubule severing proteins could be recruited through post-translation modifications of tubulin  
442 instead of via ESCRTs (McNally & Roll-Mecak, 2018). This could explain why we observe excess  
443 MBRs at the apical membrane in knockout brains: they could be tethered by a hollow membrane bridge.  
444 Alternatively, increased MBRs in *Cep55*<sup>-/-</sup> mice could indicate a problem in MBR disposal or  
445 engulfment, as MBRs can bind to cell receptors and be internalized, influencing downstream cell polarity  
446 and fate (Peterman et al., 2019; Pollarolo et al., 2011; Singh & Pohl, 2014). Clearly, more work is needed  
447 to refine the general abscission model to determine the exact roles of Cep55 at the molecular level, the  
448 mechanisms that may recruit ESCRT proteins besides Cep55, and whether either membrane scission or  
449 microtubule disassembly can be achieved without ESCRT components.

450 Tissue-specific p53-dependent responses appear to be a major factor in the disproportionate  
451 consequence of *Cep55* loss for brain size compared to the rest of the body. This is consistent with recent  
452 evidence for variable sensitivity of different murine developing tissues to p53 activation (Bowen et al.,  
453 2019), and differential p53-dependent responses to cell stress in specific cell contexts (Kastenhuber &  
454 Lowe, 2017). First, we find increased p53 expression and apoptosis in *Cep55*<sup>-/-</sup> binucleate NSCs, but not  
455 binucleate MEFs. Second, apoptosis is increased in *Cep55*<sup>-/-</sup> CNS tissues, but not in other embryonic  
456 body tissues. Finally, we show prevention of p53-dependent apoptosis partially rescues brain size in  
457 *Cep55*<sup>-/-</sup> mice, but does not improve body size or survival. It is likely that in multiple *Cep55*<sup>-/-</sup> cell  
458 types, abscission delays and failures hinder proliferation, resulting in decreased growth of body tissues,  
459 but that in NSCs they additionally result in p53-dependent apoptosis. The explanation for this might be  
460 that some tissues have a higher tolerance for abnormal cells. Indeed, some mammalian tissues, such as the  
461 liver and heart, have binucleate cells normally (Guidotti et al., 2003; Paradis et al., 2014); and syncytia  
462 development by incomplete cytokinesis is part of testis development (Greenbaum et al., 2011; Ren &  
463 Russell, 1991). The brain appears to have a low threshold for damaged cells to activate p53; several  
464 microcephalies involve p53-dependent apoptosis (Bianchi et al., 2017; Houlihan & Feng, 2014; Insolera  
465 et al., 2014; Little & Dwyer, 2019; Mao et al., 2016). Since cortical NSCs undergo many rounds of cell  
466 divisions to stochastically create lineage trees of different daughter cell types (Dwyer et al., 2016; Llorca  
467 et al., 2019), even low rates of errors early in development can have profound effects on neuron  
468 production and brain growth.

469 *Cep55* mutants serve as models for an emerging spectrum of human brain malformations. Human  
470 mutations in *Cep55* also cause severe defects in CNS development and surprising relative sparing of other  
471 tissues. Different alleles identified so far seem to cause a range of phenotypic severity. Null (nonsense)  
472 mutations result in lethal hydranencephaly, a fluid-filled skull with almost no brain tissue (Bondeson et  
473 al., 2017; Frosk et al., 2017; Rawlins et al., 2019). Compound heterozygotes for one nonsense allele and  
474 one missense allele have microcephaly, a small brain with normal structure. Finally, splicing mutations in

475 *Cep55* result in micro-lissencephaly, a small brain with fewer sulci and gyri. The latter two classes of  
476 patients survived (Barrie et al., 2020). Unlike humans and mice with *Cep55* mutations, a zebrafish *Cep55*  
477 mutant has small eyes (Jeffery et al., 2015; Yanagi et al., 2019). The developing eye is a neuroepithelium  
478 with NSCs that are similar to those in the brain, so it is unclear why the human and mouse do not have  
479 small eyes upon *Cep55* loss. A possible explanation is that fish have larger eyes than forebrains, so their  
480 eye growth may require the abscission speed and accuracy that *Cep55* ensures. Together these data  
481 suggest *Cep55* may have evolved in vertebrates to help build bigger more complex nervous systems.

482 During the writing of this manuscript, another research group published the phenotype of a *Cep55*  
483 knockout mouse (Tedeschi et al., 2020). They similarly found *Cep55* *-/-* mice have microcephaly  
484 disproportionate to body size reduction, an accumulation of binucleate NSCs, and apoptosis specific to  
485 neural tissues. However, we performed additional analyses that cause us to differ with some of their  
486 interpretations. First, we differ in that we find ESCRTs are sometimes recruited in *Cep55* *-/-* cells. We are  
487 the first two groups to attempt to answer this question quantitatively, and more work is needed by cell  
488 biologists to determine if and how ESCRTs can be recruited without *Cep55* in vertebrate cells. Second,  
489 we show specific abscission defects occur in *Cep55* *-/-* cortices, not simply binucleate cells: we find  
490 abscission delay, midbody structural defects, and MBR accumulation in our *in vivo* brain  
491 analyses. Importantly, we are the first to show *Cep55* is not required for microtubule disassembly during  
492 abscission. Future work will determine if *Cep55* *-/-* NSCs are completing abscission without ESCRT  
493 components, or whether recruitment is simply reduced or delayed. Third, we do find evidence of a role for  
494 *Cep55* in abscission of non-neural cell divisions, suggesting that *Cep55* and the ESCRT system are not  
495 dispensable for non-neural cells. Finally, we identify contrasting p53 responses to cytokinetic defects in  
496 different cell types as a potential mechanism leading to disparate secondary consequences and tissue  
497 phenotypes. Our data suggest that cell division defects and apoptosis are related, with increased p53  
498 expression occurring in binucleate *Cep55* *-/-* cortical cells. Future work by many groups with  
499 complimentary approaches will be needed to understand *Cep55* knockout phenotypes, why *Cep55*  
500 evolved in vertebrates, and the complex regulation of cytokinesis in developing tissues.

501

## 502 **Materials and Methods**

503

### 504 *Mice*

505

506 Mouse colonies were maintained in accordance with NIH guidelines and policies approved by the  
507 IACUC. Embryos were harvested by cesarean section, and the morning of the vaginal plug was  
508 considered E0.5. Littermate embryos served as controls for all experiments and all parent and embryo  
509 genotypes were confirmed by PCR. The *Cep55* allele (strain C57BL/6NCep55<sup>em1(IMPC)<sup>Tep</sup></sup> was made as  
510 part of the KOMP2 phase 2 project at the Toronto Centre for PhenoGenomics for the Canadian Mouse  
511 Mutant Repository. It was maintained on C57BL/6 and 50/50% C57BL/6 and FVB/N background

512 embryos, which were used for experiments. We verified the correct mutation in our mutants with DNA  
513 sequencing and RT-PCR (data not shown). p53 knockout (Trp53<sup>tm1Tyj</sup>) mice on C57BL/6 background  
514 were obtained from The Jackson Laboratory [(Jacks et al., 1994); JAX stock #002101 The Jackson  
515 Laboratory Bar Harbor, ME]. These mice were bred with 50/50% C57BL/6 and FVB/N Cep55 knockout  
516 embryos for creation of the Cep55;p53 mouse line. Cep55 heterozygous mice were crossed with both the  
517 mT/mG reporter line (JAX stock #007576, The Jackson Laboratory Bar Harbor, ME) and Sox2-Cre mice  
518 (JAX stock #0085454, The Jackson Laboratory Bar Harbor, ME(Hayashi et al., 2002; Muzumdar et al.,  
519 2007) to produce mice that express plasma membrane-localized GFP. Sex of embryonic mice were not  
520 noted as sex was not a relevant biological variable for these experiments. The specific ages of embryonic  
521 mice used is noted in figure legends for each experiment.

522  
523 For survival analyses, pups were kept with their mother and littermates. Milk was noted in the bellies of  
524 Cep55<sup>-/-</sup> and Cep55;p53 double knockout mice until at least P2. Pups were weaned at 21-25 days, unless  
525 too small to be separated from mothers. In some situations, pups were euthanized due to severe failure to  
526 thrive for humane reasons, and that was recorded as the day of death; in most cases pups died without  
527 intervention.

#### 528 529 *Immunoblotting*

530  
531 MEF cells were washed with ice cold PBS, and lysed directly on the plate (6cm) into lysis buffer (500  
532  $\mu$ l); 50mM Tris HCl, 150mM NaCl, 1% NP-40, 1mM EDTA, 1mM DTT, 1mM PMSF, 1X HALT  
533 protease/phosphatase inhibitor cocktail. After incubating lysates on a rotisserie at 4° C for 30 minutes,  
534 lysate were cleared by centrifugation at 21k x g for 15 min at 4° C. Supernatants were diluted to 1x with  
535 5X Laemmli buffer for western blot. Equivalent amounts of cells within each experiment were run on a 4-  
536 20% polyacrylamide gel. After transfer onto nitrocellulose with the BioRad Transblot Turbo, membrane  
537 was blocked with Licor TBS blocking buffer for 1 hour at room temp. Primary and secondary antibodies  
538 were diluted in 50% blocking buffer, 50% TBS, final 0.1% Tween-20. Primary antibodies were  
539 incubated overnight at 4° C, and after washing, followed by appropriate species specific near-infrared  
540 (680 or 800nm) secondary antibodies for 1 hour at room temperature. Blots were imaged with the dual  
541 color Licor Odyssey CLx imager. Densitometry of western blots was performed with Licor Image Studio  
542 software. Primary antibodies used: rabbit monoclonal anti human beta-actin (1:10,000, Clone13E5 4970  
543 Cell Signaling, Danvers, MA) and mouse monoclonal anti-mouse Cep55 raised against amino acids 163-  
544 462 mapping at the C-terminus (1:1000, sc-377018 Santa Cruz, Dallas, Texas).

#### 545 546 *Immunostaining and H&E Staining*

547  
548 To collect cryosections for immunohistochemistry in supplemental figure 2, and figures 3, 5, 9, 10 and  
549 11, age E12.5, E14.5 and P0 brains were removed from heads and fixed for 4, 6 and 24 hours,  
550 respectively, in 4% PFA, followed by immersion in 30% sucrose in PBS overnight. Whole E10.5  
551 embryos (used in figure 9) were fixed overnight. Next, whole brains or embryos were embedded in  
552 O.C.T. compound (Tissue-Tek 4583, Sakura Torrance, CA) and cryosections were cut at 20  $\mu$ m  
553 thickness and collected on Superfrost Plus slides (Fisher Scientific, 12-550-15). Frozen sections were  
554 stored at -80 degrees. Prior to immunostaining, cryosections were warmed to room temperature, then if  
555 antigen retrieval was needed (Pax6, Tbr2, p53 antibodies), immersed in 10 mM citrate buffer at 95  
556 degrees for 20 minutes. After cooling, sections were blocked in 2% NGS for 1 hour, followed by  
557 incubation with primary antibodies overnight at 4° C. The next day, after PBS washes, sections were  
558 incubated with AlexaFluor secondary antibodies at 1:200 and DAPI at 1:100 for 30 min followed by PBS  
559 washes and coverslipping with VectaShield fluorescent mounting medium.

560  
561 For immunofluorescence (IF) on coverslips of dissociated cortical progenitors and MEFs (figures 2, 6, 7,  
562 and 10), a similar protocol was used but with primary antibodies applied for 3 h at room temperature.

563 Antigen retrieval was not used in dissociated progenitors except in the case of Tbr2 immunostaining;  
564 coverslips were immersed in 0.07M NaOH pH 13 for 2 min before permeabilization. Coverslips were  
565 mounted on Superfrost Plus slides with Fluoro-Gel (Electron Microscopy Sciences, Hatfield, PA, 17985-  
566 10).

567  
568 Paraffin-embedded brains were sectioned and stained with hematoxylin and eosin (H & E) by the UVA  
569 Research Histology Core for Figures 1 and Supplemental Figure 2.

#### 570 571 *Cortical cell cultures*

572  
573 Cells were dissociated from E14.5 cortices following a protocol adapted from Sally Temple's laboratory  
574 (Qian et al., 1998). The Worthington Papain Dissociation Kit was used to dissociate cells (Worthington  
575 Biochemical Corporation, Lakewood, NJ, Cat # LK003150). Cells were cultured in DMEM with Na-  
576 Pyruvate, L-Glutamine, B-27, N2, N-acetyl-cysteine and basic fibroblast growth factor (Final Culture  
577 Media). After 24 or 48 hrs, cells were fixed by adding an equal volume of room temperature 8% PFA  
578 (paraformaldehyde) for 5 min to cell media, followed by removal of media and addition of -20° cold  
579 methanol for 5 min.

#### 580 581 *Mouse embryonic fibroblast (MEF) cultures*

582  
583 Embryos from timed pregnant females were collected at E14.5. Embryos were decapitated, internal  
584 organs were removed from body cavities and remaining tissue was triturated with a 1 ml pipette and  
585 incubated in 1ml of 0.25% trypsin-EDTA for 25min at 37°C. The tissue was further triturated and tubes  
586 were spun at 1000 rpm for 5 min and the medium was aspirated off. The pellet was resuspended in  
587 DMEM/20% FBS with pen/strep added. The resulting cells from each embryo were plated in two 10 cm  
588 plates in DMEM/10% FBS. The next day, media was replaced. When approaching confluence, cells were  
589 trypsinized and plated on fibronectin-coated coverslips, grown overnight, and fixed with 4%  
590 paraformaldehyde (PFA) for 10 minutes or cold methanol for 10 minutes at 24 or 48 hrs.

#### 591 592 *Cortical slabs for apical membrane view*

593  
594 Cortical slabs were prepared as previously described (Janisch & Dwyer, 2016). The meninges and skull  
595 were removed to expose the brain in E12.5 and E14.5 embryos, followed by fixation with 2% PFA for 20  
596 min. Next, apical slabs were made by pinching off cortices, flipping so that the apical surface was upright,  
597 and trimming to flatten the slab. Slabs were fixed for another 2 min with 2% PFA followed by blocking  
598 with 5% normal goat serum (NGS) for 1 h. Primary antibodies were applied for 1 h at room temperature  
599 and then moved to 4° overnight. The next day, after 3 times, 10-minute PBS (phosphate-buffered saline)  
600 washes, secondary antibodies and DAPI were applied at a concentration of 1:200 for 30 minutes. After  
601 two more 10-minute PBS washes, slabs were coverslipped with VectaShield fluorescent mounting  
602 medium (Vector Laboratories Inc., Burlingame, CA H-1000) and imaged. z-stack depth was 8–20 µm and  
603 step size was 0.5 µm.

#### 604 605 *Flow Cytometry*

606  
607 Cells from E15.5 brains were dissociated using the Papain Dissociation Kit (Worthington Biochemical  
608 Corporation). Single-cell suspensions were obtained by filtering through a 40 µm filter (BD Falcon Cell  
609 Strainer, blue nylon mesh, catalog #352340). For propidium iodide (PI) staining, cells were resuspended  
610 in 500 µl PBS and added to 4.5 ml ice-cold 70% ethanol for at least 2 hours. Samples were stored at 4°C.  
611 Fixed cells were rinsed in PBS and resuspended in 1 ml solution containing 100 µg/ml RNase A, 0.1%  
612 Triton X-100 and 50 µg/ml PI, and incubated at room temperature for 30 minutes in the dark. For Ki-67  
613 and DAPI analysis, single-cell suspensions of E15.5 brains ( $n=3$  pairs of *Cep55* mutants and littermate

614 controls) were fixed in 1.5% PFA for 15 minutes on ice. Cells were then washed twice with FACS buffer  
 615 (2% BSA, 1 mM EDTA, 0.01% sodium azide, PBS) and permeabilized in 0.1% Triton X-100 in PBS for  
 616 30 minutes on ice. Cells were washed twice in FACS buffer and  $2 \times 10^6$  cells were incubated in 100  $\mu$ l  
 617 FACS buffer with 1  $\mu$ g/ml DAPI and 2  $\mu$ l anti-Ki-67 antibody (monoclonal rat anti-Ki-67 Alexa Fluor  
 618 647, clone SolA15, eBioscience, Waltham, MA). Following three washes with FACS buffer, fluorescence  
 619 was measured using a FACSCanto II flow cytometer (Becton Dickinson, Franklin Lakes, NJ). At least  
 620 20,000 events were collected per sample. Data were analyzed using FlowJo software (TreeStar).

621

### 622 *Abcission Live Imaging and Analysis*

623

624 This method was previously described in (McNeely & Dwyer, 2020), based on first establishing SiR-  
 625 tubulin for abscission duration studies in HeLa cells (Janisch et al., 2018). Briefly, E13.5 slabs were  
 626 prepared as described above and placed apical surface down in a glass-bottom dish (MatTek, Ashland,  
 627 MA, P35G-1.0–20-C) containing 50 nM SiR-Tubulin (Cytoskeleton, Denver, CO CY-SC002) in Final  
 628 Culture Medium (described above). Each dish was placed in a humidifying chamber and into a 37 °C  
 629 incubator with 5% CO<sub>2</sub> overnight (approximately 15 h). The next day, the cortices were removed from  
 630 the incubator, and prepared for imaging by adding Matrigel (Corning, Corning, NY, 356237; 1:3 dilution  
 631 in Final Culture Medium) and a coverslip (Fisher 12–545-100) over the top of the cortical slab explant.  
 632 Matrigel was allowed to solidify for 5 min in the incubator before final culture medium with 2% 4-(2-  
 633 hydroxyl)-1-piperazineethanesulfonic acid (Gibco, Waltham, MA 15630080) was added to the dish, and  
 634 then, imaging was performed. An Applied Precision (GE) DeltaVision with a heating plate and 40 $\times$   
 635 objective (numerical aperture 1.53) was used for time-lapse image acquisition; z stacks of images  $\sim$ 10-  
 636  $\mu$ m deep (z steps 0.4  $\mu$ m) were taken every 15 min for abscission for up to 6 h. To minimize  
 637 phototoxicity, the neutral density filter was set at 32% or lower, and the exposure time was kept to a  
 638 minimum ( $<$ 0.1 ms per slice). Deconvolved full z stacks and maximum intensity projection images were  
 639 analyzed using ImageJ. For abscission duration, time 0 was midbody formation as ascertained by SiR-  
 640 Tubulin appearance (compact microtubule bundles). Abscission completion was scored as the time point  
 641 when there was complete removal of microtubules on a midbody flank ascertained when the SiR-Tubulin  
 642 signal intensity decreased to background level. Midbody membrane scission was shown to be temporally  
 643 coincident with midbody flank microtubule disassembly by several previous publications using  
 644 differential interference contrast or phase imaging of cell lines in two-dimensional dissociated cultures  
 645 (Elia et al., 2011; Lafaurie-Janvore et al., 2013; Steigemann et al., 2009); however here, we cannot rule  
 646 out the possibility that the midbody plasma membrane might remain connected for some period of time  
 647 after the microtubules are gone.

648

### 649 *Antibodies*

650

651 Antibodies used in this analysis: mouse monoclonal anti- mouse citron kinase (1:100, CITK; 611367 BD  
 652 Biosciences, San Jose, CA), mouse polyclonal anti-human Cep55 (1:00, H00055165-B01P Abnova,  
 653 Taipei, Taiwan), mouse monoclonal anti-mouse Cep55 (1:100 for immunofluorescence experiments, sc-  
 654 377018 Santa Cruz, , Dallas, Texas), rabbit polyclonal anti-human CC3 (1:250, 9661s Cell-Signaling,  
 655 Danvers, MA), rat monoclonal anti-mouse Tbr2 (1:200, 14-4875, eBioscience (Thermo Fisher Scientific),  
 656 Waltham, MA), rabbit polyclonal anti-mouse Pax6 (1:200, PRB-278P, BioLegend, San Diego, CA),  
 657 mouse monoclonal anti-rat Aurora B kinase (1:300, 611082 BD Biosciences, San Jose, CA), rabbit  
 658 monoclonal anti-human Aurora B kinase (1:100, ab2254, Abcam, Cambridge, MA), rat monoclonal  
 659 alpha-tubulin (1:300, NB600-506, Novus Biologicals, Centennial, CO), rabbit monoclonal anti-human  
 660 PH3 (1:200, 3458 Cell Signaling, Danvers, MA), chicken polyclonal anti-mouse Nestin (1:600, NES,  
 661 Aves Labs, Davis, CA), rat monoclonal anti-human Ki67 (1:100, 14-5698 eBioscience, Waltham, MA),  
 662 rabbit polyclonal anti-mouse p53 (1:500, NCL-L-p53-CM5p Leica Biosystems, Wetzlar, Germany), rat  
 663 monoclonal anti-human Ctip2 (1:400, 18465 Abcam, Cambridge, MA ), rabbit polyclonal anti-mouse  
 664 Tbr1 (1:200, 31940 Abcam, Cambridge, MA), rabbit monoclonal Satb2 (1:200 Ab92446 Abcam,

665 Cambridge, MA), rabbit polyclonal pericentrin (1:500, 92371, BioLegend, San Diego, CA), mouse  
 666 monoclonal Tubb3 (Tuj1) (1:500, 801201, BioLegend, San Diego, CA), mouse monoclonal phospho-  
 667 histone H3 (Ser10) (1:200, 9706, Cell Signaling, Danvers, MA), Phalloidin Oregon Green or 568 (1:50,  
 668 07466, A12380 Invitrogen, Waltham, MA), chicken polyclonal anti-human alpha-tubulin (1:100, ab89984  
 669 Abcam, Cambridge, MA), mouse monoclonal Alix (1:100, SC-53538 Santa Cruz, Dallas, Texas), mouse  
 670 monoclonal Tsg101 (1:100, SC-7964 Santa Cruz, Dallas, Texas), rabbit polyclonal CHMP2A (1:100,  
 671 10477-1-AP Proteintech, Chicago, IL), rat monoclonal Zo-1 (1:50, R26.4DC, DSHB, Iowa City, IA) and  
 672 polyclonal rabbit anti Zo-1 (1:50 61-7300, rabbit, Invitrogen (Thermo Fisher Scientific), Waltham, MA).  
 673 All antibodies were validated for the application used in multiple previous publications.

674

#### 675 *Imaging and statistical analysis*

676

677 Images used for data analysis in supplemental figures 2F-G, and figures 2C-E, 6, 9, 10 and 11 were  
 678 collected on either a Zeiss Axio ImagerZ1 microscope with AxioCam MRm or a Zeiss AxioObserver  
 679 fluorescent widefield inverted scope microscope. Images in figures 2A-B, 3, 4, 5A-B, 7 and 8 were taken  
 680 on an inverted DeltaVision with TrueLight deconvolution microscope with softWoRx Suite 5.5 image  
 681 acquisition software (Applied Precision (GE Healthcare), Issaquah, WA). A Leica MZI6F microscope  
 682 with DFC300FX camera was used for images in Figures 1 and 11A-C, and supplemental figures 1 and  
 683 2A-E. Control and mutant fluorescence images were collected with the same exposure times and on the  
 684 same day. All image analysis was performed in ImageJ/Fuji and any changes to brightness and contrast  
 685 were applied uniformly across images. Statistical analyses were performed using Excel (Microsoft) or  
 686 GraphPad PRISM software. The sample sizes were pre-determined based on our lab's previous  
 687 experience with cortical development analyses and others' published results. After obtaining pilot data,  
 688 power analyses were performed if necessary to determine if the number of samples obtained was high  
 689 enough for the effect size seen. NSC cultures that were unhealthy were not imaged and analyzed, but no  
 690 other data was excluded from the analysis. No randomization or blinding was used as no experimental  
 691 manipulation was applied other than genetic knockouts. Genotyping was performed after collection of  
 692 embryos to determine genetic status. Statistical tests used are specified in each figure legend. For each  
 693 sample set a statistical test of normality was performed using GraphPad PRISM software. Parametric tests  
 694 were used when sample sets had a normal distribution and non-parametric tests were used when sample  
 695 sets did not have a normal distribution. Variance was calculated and was typically similar between  
 696 groups.

697

#### 698 **Acknowledgements**

699 This work was supported by NIH Grants RO1 NS076640 and R21 NS1006162 to N.D.D., NIH Grant F30  
 700 HD093290 to J.N.L., and UVA Cell and Molecular Biology Training Grant 2T32GM008136-31A1 to  
 701 J.N.L. We thank Bettina Winckler, Xiaowei Lu, Ann Sutherland, Michael McConnell, Todd Stukenberg  
 702 and their laboratories for advice and discussion. We thank Adriana Ehlers, Gabrielle Wolfe and Naaz  
 703 Daneshvar for help with cryosectioning and taking images. We are grateful to the Canadian Mouse  
 704 Mutant Repository for use of the Cep55 allele sperm samples and to the UVA Genetically Engineered  
 705 Murine Model (GEMM) Core for in-vitro fertilization services. We thank the UVA Flow Cytometry Core  
 706 for use of flow cytometry facilities.

707

#### 708 **Competing interests**

709 The authors have no competing interests to declare.

710

#### 711 **References**

712

713 Addi, C., Presle, A., Fremont, S., Cuvelier, F., Rocancourt, M., Milin, F., Schmutz, S., Chamot-Rooke, J.,  
 714 Douche, T., Duchateau, M., Giai Gianetto, Q., Salles, A., Menager, H., Matondo, M.,  
 715 Zimmermann, P., Gupta-Rossi, N., & Echard, A. (2020). The Flemmingsome reveals an ESCRT-



- 716 to-membrane coupling via ALIX/syntenin/syndecan-4 required for completion of cytokinesis. *Nat*  
 717 *Commun*, 11(1), 1941. doi:10.1038/s41467-020-15205-z
- 718 Barrie, E. S., Overwater, E., van Haelst, M. M., Motazacker, M. M., Truxal, K. V., Crist, E., Mostafavi,  
 719 R., Pivnick, E. K., Choudhri, A. F., Narumanchi, T., Castelluccio, V., Walsh, L. E., Garganta, C.,  
 720 & Gastier-Foster, J. M. (2020). Expanding the spectrum of CEP55-associated disease to viable  
 721 phenotypes. *Am J Med Genet A*, 182(5), 1201-1208. doi:10.1002/ajmg.a.61512
- 722 Bastos, R. N., & Barr, F. A. (2010). Plk1 negatively regulates Cep55 recruitment to the midbody to  
 723 ensure orderly abscission. *J Cell Biol*, 191(4), 751-760. doi:10.1083/jcb.201008108
- 724 Bianchi, F. T., Tocco, C., Pallavicini, G., Liu, Y., Verni, F., Merigliano, C., Bonaccorsi, S., El-Assawy,  
 725 N., Priano, L., Gai, M., Berto, G. E., Chiotto, A. M., Sgro, F., Caramello, A., Tasca, L., Ala, U.,  
 726 Neri, F., Oliviero, S., Mauro, A., Geley, S., Gatti, M., & Di Cunto, F. (2017). Citron Kinase  
 727 Deficiency Leads to Chromosomal Instability and TP53-Sensitive Microcephaly. *Cell Rep*, 18(7),  
 728 1674-1686. doi:10.1016/j.celrep.2017.01.054
- 729 Bondeson, M. L., Ericson, K., Gudmundsson, S., Ameer, A., Ponten, F., Westrom, J., Frykholm, C., &  
 730 Wilbe, M. (2017). A nonsense mutation in CEP55 defines a new locus for a Meckel-like  
 731 syndrome, an autosomal recessive lethal fetal ciliopathy. *Clin Genet*, 92, 510-516.  
 732 doi:10.1111/cge.13012
- 733 Bowen, M. E., McClendon, J., Long, H. K., Sorayya, A., Van Nostrand, J. L., Wysocka, J., & Attardi, L.  
 734 D. (2019). The Spatiotemporal Pattern and Intensity of p53 Activation Dictates Phenotypic  
 735 Diversity in p53-Driven Developmental Syndromes. *Dev Cell*, 50(2), 212-228 e216.  
 736 doi:10.1016/j.devcel.2019.05.015
- 737 Carlton, J. G., Agromayor, M., & Martin-Serrano, J. (2008). Differential requirements for Alix and  
 738 ESCRT-III in cytokinesis and HIV-1 release. *Proc Natl Acad Sci U S A*, 105(30), 10541-10546.
- 739 Carlton, J. G., & Martin-Serrano, J. (2007). Parallels between cytokinesis and retroviral budding: a role  
 740 for the ESCRT machinery. *Science*, 316(5833), 1908-1912. doi:10.1126/science.1143422
- 741 Chaigne, A., Labouesse, C., Agnew, M., Hannezo, E., Chalut, K. J., & Paluch, E. K. (2019). Abscission  
 742 couples cell division to embryonic stem cell fate. *BioRxiv*, 798165. doi:10.1101/798165
- 743 Christ, L., Raiborg, C., Wenzel, E. M., Campsteijn, C., & Stenmark, H. (2017). Cellular Functions and  
 744 Molecular Mechanisms of the ESCRT Membrane-Scission Machinery. *Trends Biochem Sci*,  
 745 42(1), 42-56. doi:10.1016/j.tibs.2016.08.016
- 746 Christ, L., Wenzel, E. M., Liestol, K., Raiborg, C., Campsteijn, C., & Stenmark, H. (2016). ALIX and  
 747 ESCRT-III function as parallel ESCRT-III recruiters in cytokinetic abscission. *J Cell Biol*,  
 748 212(5), 499-513. doi:10.1083/jcb.201507009
- 749 Connell, J. W., Lindon, C., Luzio, J. P., & Reid, E. (2009). Spastin couples microtubule severing to  
 750 membrane traffic in completion of cytokinesis and secretion. *Traffic*, 10(1), 42-56.  
 751 doi:10.1111/j.1600-0854.2008.00847.x
- 752 Crowell, E. F., Gaffuri, A. L., Gayraud-Morel, B., Tajbakhsh, S., & Echard, A. (2014). Engulfment of the  
 753 midbody remnant after cytokinesis in mammalian cells. *J Cell Sci*, 127(Pt 17), 3840-3851.  
 754 doi:10.1242/jcs.154732
- 755 Di Cunto, F., Imarisio, S., Hirsch, E., Broccoli, V., Bulfone, A., Migheli, A., Atzori, C., Turco, E., Triolo,  
 756 R., Dotto, G. P., Silengo, L., & Altruda, F. (2000). Defective neurogenesis in citron kinase  
 757 knockout mice by altered cytokinesis and massive apoptosis. *Neuron*, 28(1), 115-127.
- 758 Dwyer, N. D., Chen, B., Chou, S. J., Hippenmeyer, S., Nguyen, L., & Ghashghaei, H. T. (2016). Neural  
 759 Stem Cells to Cerebral Cortex: Emerging Mechanisms Regulating Progenitor Behavior and  
 760 Productivity. *J Neurosci*, 36(45), 11394-11401. doi:10.1523/JNEUROSCI.2359-16.2016
- 761 Dwyer, N. D., Manning, D. K., Moran, J. L., Mudbhary, R., Fleming, M. S., Favero, C. B., Vock, V. M.,  
 762 O'Leary, D. D., Walsh, C. A., & Beier, D. R. (2011). A forward genetic screen with a  
 763 thalamocortical axon reporter mouse yields novel neurodevelopment mutants and a distinct Emx2  
 764 mutant phenotype. *Neural Dev*, 6(1), 3.

- 765 Elia, N., Sougrat, R., Spurlin, T. A., Hurley, J. H., & Lippincott-Schwartz, J. (2011). Dynamics of  
 766 endosomal sorting complex required for transport (ESCRT) machinery during cytokinesis and its  
 767 role in abscission. *Proc Natl Acad Sci U S A*, *108*(12), 4846-4851. doi:10.1073/pnas.1102714108
- 768 Ettinger, A. W., Wilsch-Brauninger, M., Marzesco, A. M., Bickle, M., Lohmann, A., Maliga, Z.,  
 769 Karbanova, J., Corbeil, D., Hyman, A. A., & Huttner, W. B. (2011). Proliferating versus  
 770 differentiating stem and cancer cells exhibit distinct midbody-release behaviour. *Nat Commun*, *2*,  
 771 503.
- 772 Fabbro, M., Zhou, B. B., Takahashi, M., Sarcevic, B., Lal, P., Graham, M. E., Gabrielli, B. G., Robinson,  
 773 P. J., Nigg, E. A., Ono, Y., & Khanna, K. K. (2005). Cdk1/Erk2- and Plk1-dependent  
 774 phosphorylation of a centrosome protein, Cep55, is required for its recruitment to midbody and  
 775 cytokinesis. *Dev Cell*, *9*(4), 477-488. doi:10.1016/j.devcel.2005.09.003
- 776 Frosk, P., Arts, H. H., Philippe, J., Gunn, C. S., Brown, E. L., Chodirker, B., Simard, L., Majewski, J.,  
 777 Fahiminiya, S., Russell, C., Liu, Y. P., Consortium, F. C., Canadian Rare Diseases, M.,  
 778 Mechanisms, N., Hegele, R., Katsanis, N., Goerz, C., Del Bigio, M. R., & Davis, E. E. (2017). A  
 779 truncating mutation in CEP55 is the likely cause of MARCH, a novel syndrome affecting  
 780 neuronal mitosis. *J Med Genet*, *54*(7), 490-501. doi:10.1136/jmedgenet-2016-104296
- 781 Gao, L., Jia, G., Li, A., Ma, H., Huang, Z., Zhu, S., Hou, Y., & Fu, X. (2017). RNA-Seq transcriptome  
 782 profiling of mouse oocytes after in vitro maturation and/or vitrification. *Sci Rep*, *7*(1), 13245.  
 783 doi:10.1038/s41598-017-13381-5
- 784 Goliand, I., Adar-Levor, S., Segal, I., Nachmias, D., Dadosh, T., Kozlov, M. M., & Elia, N. (2018).  
 785 Resolving ESCRT-III Spirals at the Intercellular Bridge of Dividing Cells Using 3D STORM.  
 786 *Cell Rep*, *24*(7), 1756-1764. doi:10.1016/j.celrep.2018.07.051
- 787 Green, R. A., Paluch, E., & Oegema, K. (2012). Cytokinesis in animal cells. *Annu Rev Cell Dev Biol*, *28*,  
 788 29-58. doi:10.1146/annurev-cellbio-101011-155718
- 789 Greenbaum, M. P., Iwamori, T., Buchold, G. M., & Matzuk, M. M. (2011). Germ cell intercellular  
 790 bridges. *Cold Spring Harb Perspect Biol*, *3*(8), a005850. doi:10.1101/cshperspect.a005850
- 791 Gruneberg, U., Neef, R., Li, X., Chan, E. H., Chalamalasetty, R. B., Nigg, E. A., & Barr, F. A. (2006).  
 792 KIF14 and citron kinase act together to promote efficient cytokinesis. *J Cell Biol*, *172*(3), 363-  
 793 372. doi:10.1083/jcb.200511061
- 794 Guidotti, J. E., Bregerie, O., Robert, A., Debey, P., Brechot, C., & Desdouets, C. (2003). Liver cell  
 795 polyploidization: a pivotal role for binuclear hepatocytes. *J Biol Chem*, *278*(21), 19095-19101.  
 796 doi:10.1074/jbc.M300982200
- 797 Guizetti, J., Schermelleh, L., Mantler, J., Maar, S., Poser, I., Leonhardt, H., Muller-Reichert, T., &  
 798 Gerlich, D. W. (2011). Cortical constriction during abscission involves helices of ESCRT-III-  
 799 dependent filaments. *Science*, *331*(6024), 1616-1620.
- 800 Hayashi, S., Lewis, P., Pevny, L., & McMahon, A. P. (2002). Efficient gene modulation in mouse epiblast  
 801 using a Sox2Cre transgenic mouse strain. *Mech Dev*, *119 Suppl 1*, S97-S101.
- 802 Houlihan, S. L., & Feng, Y. (2014). The scaffold protein Ndel safeguards the brain genome during S  
 803 phase of early neural progenitor differentiation. *Elife*, *3*, e03297. doi:10.7554/eLife.03297
- 804 Hu, C. K., Coughlin, M., & Mitchison, T. J. (2012). Midbody assembly and its regulation during  
 805 cytokinesis. *Mol Biol Cell*, *23*(6), 1024-1034.
- 806 Insolera, R., Bazzi, H., Shao, W., Anderson, K. V., & Shi, S. H. (2014). Cortical neurogenesis in the  
 807 absence of centrioles. *Nat Neurosci*, *17*(11), 1528-1535. doi:10.1038/nn.3831
- 808 Jacks, T., Remington, L., Williams, B. O., Schmitt, E. M., Halachmi, S., Bronson, R. T., & Weinberg, R.  
 809 A. (1994). Tumor spectrum analysis in p53-mutant mice. *Curr Biol*, *4*(1), 1-7.
- 810 Janisch, K. M., & Dwyer, N. D. (2016). Imaging and quantitative analysis of cytokinesis in developing  
 811 brains of Kinesin-6 mutant mice. *Methods Cell Biol*, *131*, 233-252.  
 812 doi:10.1016/bs.mcb.2015.06.008
- 813 Janisch, K. M., McNeely, K. C., Dardick, J. M., Lim, S. H., & Dwyer, N. D. (2018). Kinesin-6 KIF20B is  
 814 required for efficient cytokinetic furrowing and timely abscission in human cells. *Mol Biol Cell*,  
 815 *29*(2), 166-179. doi:10.1091/mbc.E17-08-0495

- 816 Janisch, K. M., Vock, V. M., Fleming, M. S., Shrestha, A., Grimsley-Myers, C. M., Rasoul, B. A., Neale,  
817 S. A., Cupp, T. D., Kinchen, J. M., Liem, K. F., Jr., & Dwyer, N. D. (2013). The vertebrate-  
818 specific Kinesin-6, Kif20b, is required for normal cytokinesis of polarized cortical stem cells and  
819 cerebral cortex size. *Development*, *140*(23), 4672-4682. doi:10.1242/dev.093286
- 820 Jeffery, J., Neyt, C., Moore, W., Paterson, S., Bower, N. I., Chenevix-Trench, G., Verkade, H., Hogan, B.  
821 M., & Khanna, K. K. (2015). Cep55 regulates embryonic growth and development by promoting  
822 Akt stability in zebrafish. *FASEB J*, *29*(5), 1999-2009. doi:10.1096/fj.14-265090
- 823 Kasthuber, E. R., & Lowe, S. W. (2017). Putting p53 in Context. *Cell*, *170*(6), 1062-1078.  
824 doi:10.1016/j.cell.2017.08.028
- 825 Lafaurie-Janvore, J., Maiuri, P., Wang, I., Pinot, M., Manneville, J. B., Betz, T., Bolland, M., & Piel, M.  
826 (2013). ESCRT-III assembly and cytokinetic abscission are induced by tension release in the  
827 intercellular bridge. *Science*, *339*(6127), 1625-1629. doi:10.1126/science.1233866
- 828 Lee, H. H., Elia, N., Ghirlando, R., Lippincott-Schwartz, J., & Hurley, J. H. (2008). Midbody targeting of  
829 the ESCRT machinery by a noncanonical coiled coil in CEP55. *Science*, *322*(5901), 576-580.  
830 doi:10.1126/science.1162042
- 831 Lenhart, K. F., & DiNardo, S. (2015). Somatic cell encystment promotes abscission in germline stem  
832 cells following a regulated block in cytokinesis. *Dev Cell*, *34*(2), 192-205.  
833 doi:10.1016/j.devcel.2015.05.003
- 834 Li, H., Bielas, S. L., Zaki, M. S., Ismail, S., Farfara, D., Um, K., Rosti, R. O., Scott, E. C., Tu, S., Chi, N.  
835 C., Gabriel, S., Erson-Omay, E. Z., Ercan-Sencicek, A. G., Yasuno, K., Caglayan, A. O.,  
836 Kaymakcalan, H., Ekici, B., Bilguvar, K., Gunel, M., & Gleeson, J. G. (2016). Biallelic  
837 Mutations in Citron Kinase Link Mitotic Cytokinesis to Human Primary Microcephaly. *Am J*  
838 *Hum Genet*, *99*(2), 501-510. doi:10.1016/j.ajhg.2016.07.004
- 839 Little, J. N., & Dwyer, N. D. (2019). p53 deletion rescues lethal microcephaly in a mouse model with  
840 neural stem cell abscission defects. *Hum Mol Genet*, *28*(3), 434-447. doi:10.1093/hmg/ddy350
- 841 Llorca, A., Ciceri, G., Beattie, R., Wong, F. K., Diana, G., Serafeimidou-Pouliou, E., Fernandez-Otero,  
842 M., Streicher, C., Arnold, S. J., Meyer, M., Hippenmeyer, S., Maravall, M., & Marin, O. (2019).  
843 A stochastic framework of neurogenesis underlies the assembly of neocortical cytoarchitecture.  
844 *Elife*, *8*. doi:10.7554/eLife.51381
- 845 Loo, L., Simon, J. M., Xing, L., McCoy, E. S., Niehaus, J. K., Guo, J., Anton, E. S., & Zylka, M. J.  
846 (2019). Single-cell transcriptomic analysis of mouse neocortical development. *Nat Commun*,  
847 *10*(1), 134. doi:10.1038/s41467-018-08079-9
- 848 Makrythanasis, P., Maroofian, R., Stray-Pedersen, A., Musaev, D., Zaki, M. S., Mahmoud, I. G., Selim,  
849 L., Elbadawy, A., Jhangiani, S. N., Coban Akdemir, Z. H., Gambin, T., Sorte, H. S., Heiberg, A.,  
850 McEvoy-Venneri, J., James, K. N., Stanley, V., Belandres, D., Guipponi, M., Santoni, F. A.,  
851 Ahangari, N., Tara, F., Doosti, M., Iwaszkiewicz, J., Zoete, V., Backe, P. H., Hamamy, H.,  
852 Gleeson, J. G., Lupski, J. R., Karimiani, E. G., & Antonarakis, S. E. (2018). Biallelic variants in  
853 KIF14 cause intellectual disability with microcephaly. *Eur J Hum Genet*. doi:10.1038/s41431-  
854 017-0088-9
- 855 Mao, H., McMahon, J. J., Tsai, Y. H., Wang, Z., & Silver, D. L. (2016). Haploinsufficiency for Core  
856 Exon Junction Complex Components Disrupts Embryonic Neurogenesis and Causes p53-  
857 Mediated Microcephaly. *PLoS Genet*, *12*(9), e1006282. doi:10.1371/journal.pgen.1006282
- 858 McNally, F. J., & Roll-Mecak, A. (2018). Microtubule-severing enzymes: From cellular functions to  
859 molecular mechanism. *J Cell Biol*, *217*(12), 4057-4069. doi:10.1083/jcb.201612104
- 860 McNeely, K. C., & Dwyer, N. D. (2020). Cytokinesis and postabscission midbody remnants are regulated  
861 during mammalian brain development. *Proc Natl Acad Sci U S A*, *117*(17), 9584-9593.  
862 doi:10.1073/pnas.1919658117
- 863 Mierzwa, B., & Gerlich, D. W. (2014). Cytokinetic abscission: molecular mechanisms and temporal  
864 control. *Dev Cell*, *31*(5), 525-538. doi:10.1016/j.devcel.2014.11.006
- 865 Moawia, A., Shaheen, R., Rasool, S., Waseem, S. S., Ewida, N., Budde, B., Kawalia, A., Motameny, S.,  
866 Khan, K., Fatima, A., Jameel, M., Ullah, F., Akram, T., Ali, Z., Abdullah, U., Irshad, S., Hohne,

- 867 W., Noegel, A. A., Al-Owain, M., Hortnagel, K., Stobe, P., Baig, S. M., Nurnberg, P., Alkuraya,  
868 F. S., Hahn, A., & Hussain, M. S. (2017). Mutations of KIF14 cause primary microcephaly by  
869 impairing cytokinesis. *Ann Neurol*, *82*(4), 562-577. doi:10.1002/ana.25044
- 870 Morita, E., Sandrin, V., Chung, H. Y., Morham, S. G., Gygi, S. P., Rodesch, C. K., & Sundquist, W. I.  
871 (2007). Human ESCRT and ALIX proteins interact with proteins of the midbody and function in  
872 cytokinesis. *EMBO J*, *26*(19), 4215-4227. doi:10.1038/sj.emboj.7601850
- 873 Muzumdar, M. D., Tasic, B., Miyamichi, K., Li, L., & Luo, L. (2007). A global double-fluorescent Cre  
874 reporter mouse. *Genesis*, *45*(9), 593-605. doi:10.1002/dvg.20335
- 875 Paradis, A. N., Gay, M. S., & Zhang, L. (2014). Binucleation of cardiomyocytes: the transition from a  
876 proliferative to a terminally differentiated state. *Drug Discov Today*, *19*(5), 602-609.  
877 doi:10.1016/j.drudis.2013.10.019
- 878 Peterman, E., Gibieza, P., Schafer, J., Skeberdis, V. A., Kaupinis, A., Valius, M., Heiligenstein, X.,  
879 Hurbain, I., Raposo, G., & Prekeris, R. (2019). The post-abscission midbody is an intracellular  
880 signaling organelle that regulates cell proliferation. *Nat Commun*, *10*(1), 3181.  
881 doi:10.1038/s41467-019-10871-0
- 882 Pollarolo, G., Schulz, J. G., Munck, S., & Dotti, C. G. (2011). Cytokinesis remnants define first neuronal  
883 asymmetry in vivo. *Nat Neurosci*, *14*(12), 1525-1533.
- 884 Rawlins, L. E., Jones, H., Wenger, O., Aye, M., Fasham, J., Harlalka, G. V., Chioza, B. A., Miron, A.,  
885 Ellard, S., Wakeling, M., Crosby, A. H., & Baple, E. L. (2019). An Amish founder variant  
886 consolidates disruption of CEP55 as a cause of hydranencephaly and renal dysplasia. *Eur J Hum*  
887 *Genet*, *27*(4), 657-662. doi:10.1038/s41431-018-0306-0
- 888 Ren, H. P., & Russell, L. D. (1991). Clonal development of interconnected germ cells in the rat and its  
889 relationship to the segmental and subsegmental organization of spermatogenesis. *Am J Anat*,  
890 *192*(2), 121-128. doi:10.1002/aja.1001920203
- 891 Said Halidi, K. N., Fontan, E., Boucharlat, A., Davignon, L., Charpentier, M., Boulle, M., Weil, R., Israel,  
892 A., Laplantine, E., & Agou, F. (2019). Two NEMO-like Ubiquitin-Binding Domains in CEP55  
893 Differently Regulate Cytokinesis. *iScience*, *20*, 292-309. doi:10.1016/j.isci.2019.08.042
- 894 Singh, D., & Pohl, C. (2014). A function for the midbody remnant in embryonic patterning. *Commun*  
895 *Integr Biol*, *7*, e28533. doi:10.4161/cib.28533
- 896 Skop, A. R., Liu, H., Yates, J., 3rd, Meyer, B. J., & Heald, R. (2004). Dissection of the mammalian  
897 midbody proteome reveals conserved cytokinesis mechanisms. *Science*, *305*(5680), 61-66.
- 898 Steigemann, P., Wurzenberger, C., Schmitz, M. H., Held, M., Guizetti, J., Maar, S., & Gerlich, D. W.  
899 (2009). Aurora B-mediated abscission checkpoint protects against tetraploidization. *Cell*, *136*(3),  
900 473-484.
- 901 Stoten, C. L., & Carlton, J. G. (2018). ESCRT-dependent control of membrane remodelling during cell  
902 division. *Semin Cell Dev Biol*, *74*, 50-65. doi:10.1016/j.semcdb.2017.08.035
- 903 Tedeschi, A., Almagro, J., Renshaw, M. J., Messal, H. A., Behrens, A., & Petronczki, M. (2020). Cep55  
904 promotes cytokinesis of neural progenitors but is dispensable for most mammalian cell divisions.  
905 *Nat Commun*, *11*(1), 1746. doi:10.1038/s41467-020-15359-w
- 906 Van de Putte, T., Zwijsen, A., Lonnoy, O., Rybin, V., Cozijnsen, M., Francis, A., Baekelandt, V., Kozak,  
907 C. A., Zerial, M., & Huylebroeck, D. (2001). Mice with a homozygous gene trap vector insertion  
908 in *mgcRacGAP* die during pre-implantation development. *Mech Dev*, *102*(1-2), 33-44.  
909 doi:10.1016/s0925-4773(01)00279-9
- 910 Visel, A., Thaller, C., & Eichele, G. (2004). GenePaint.org: an atlas of gene expression patterns in the  
911 mouse embryo. *Nucleic Acids Res*, *32*(Database issue), D552-556. doi:10.1093/nar/gkh029
- 912 Yanagi, K., Sone, R., Ohga, R., & Kawahara, A. (2019). Involvement of the centrosomal protein 55  
913 (*cep55*) gene in zebrafish head formation. *Genes Cells*, *24*(10), 642-649. doi:10.1111/gtc.12715
- 914 Zhao, W. M., Seki, A., & Fang, G. (2006). Cep55, a microtubule-bundling protein, associates with  
915 centralspindlin to control the midbody integrity and cell abscission during cytokinesis. *Mol Biol*  
916 *Cell*, *17*(9), 3881-3896.  
917
